# Supplementary material for: microRNA Expression Profile in Obesity-Induced Kidney Disease Driven by High-Fat Diet in Mice
Source: MDPI journal article supplement (doi:10.3390/nu16050691), 2024-02-28
Supplement: s1 [file s1]

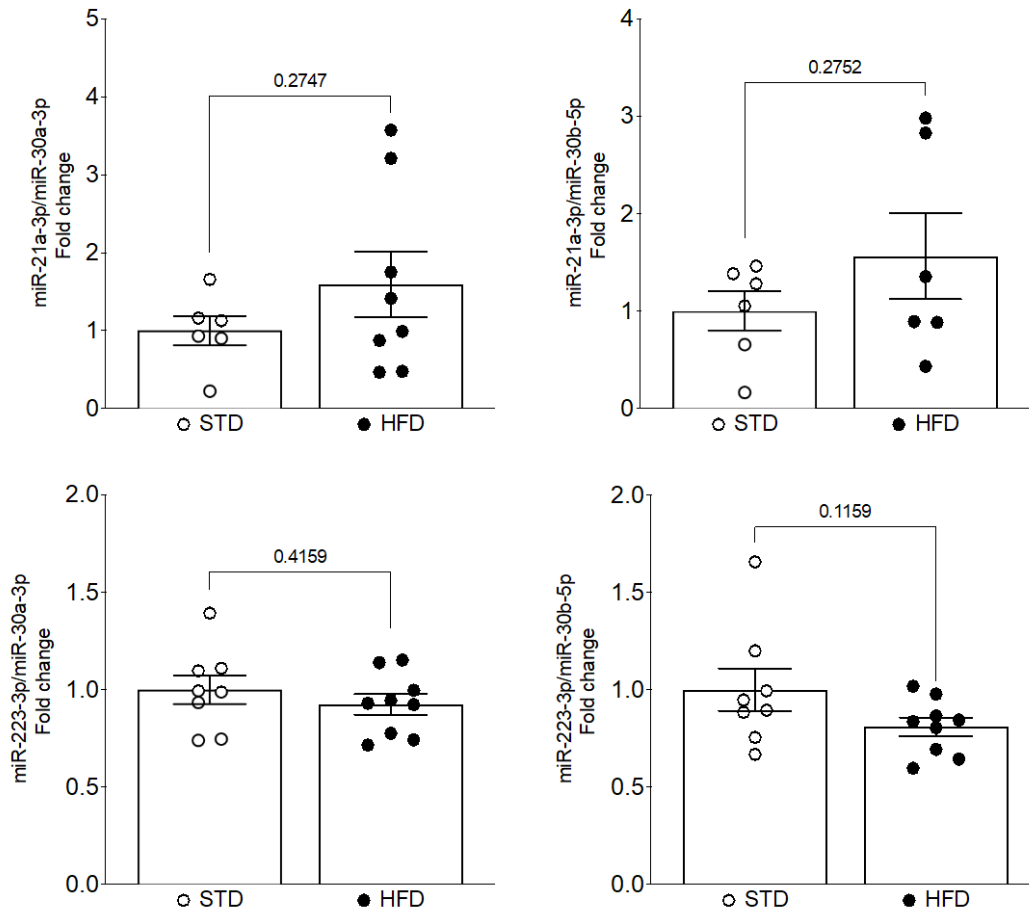

**Figure S1. Expression levels of miR-21a-3p and miR-223-3p in the mouse kidney upon HFD feeding.** miRNAs levels were determined by real-time qPCR and expressed as fold change over STD (value = 1.0) after normalizing for both miR-30a-3p and miR-30b-5p, as endogenous controls. Data are presented as mean  $\pm$  SEM (n=6-9 mice/group).

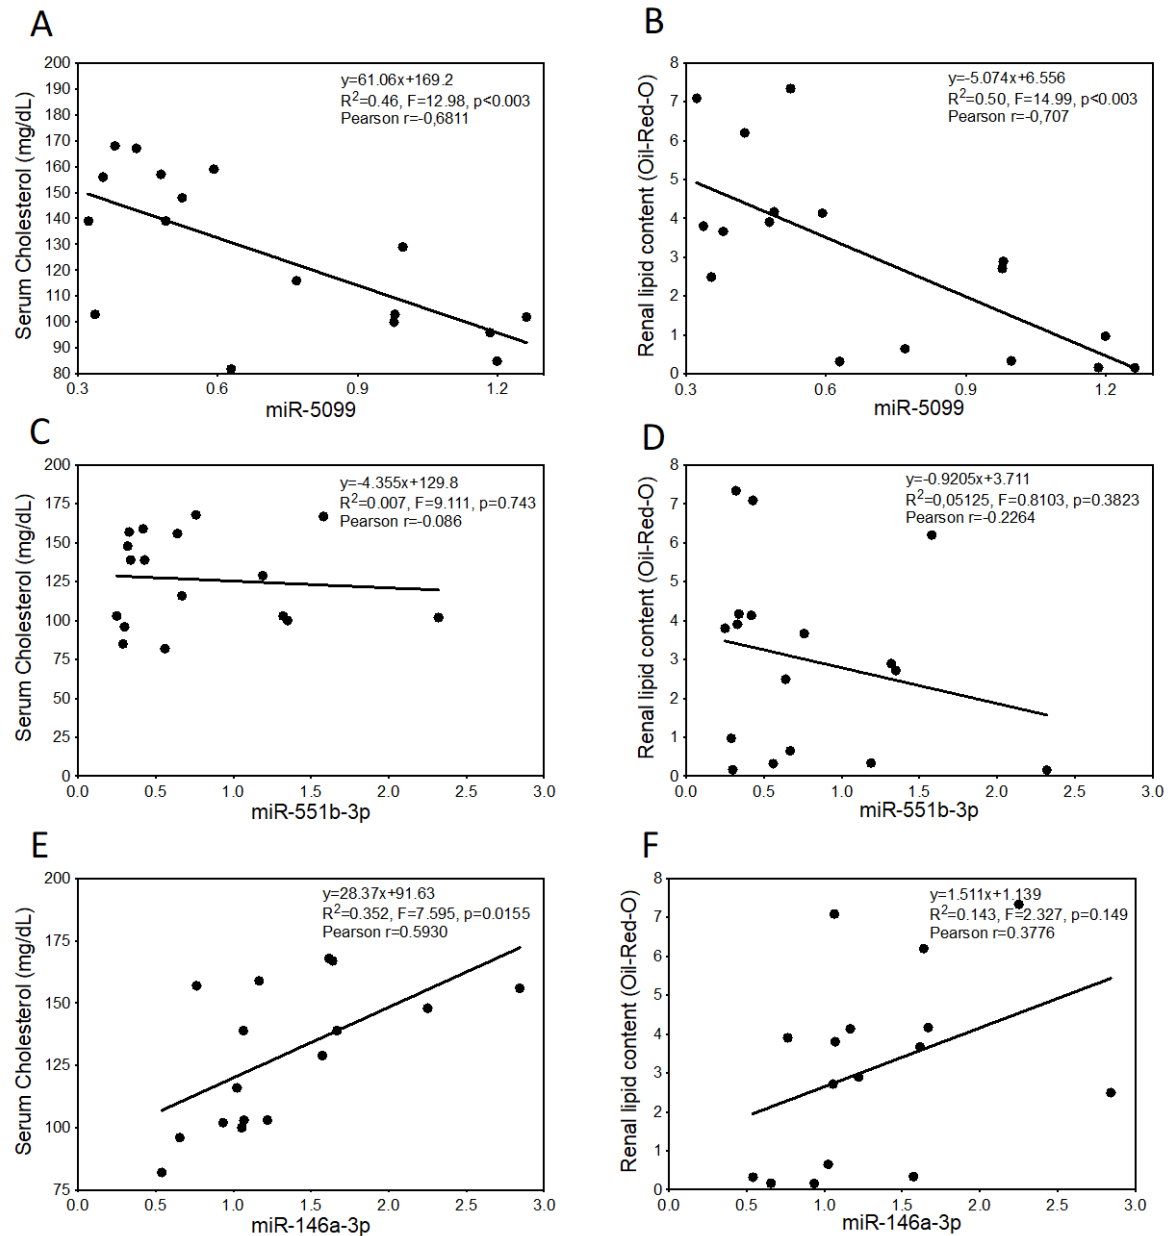

**Figure S2. Correlation analysis between miR-5099, miR-551b-3p, miR-146a-3p expressions and serum cholesterol levels and/or renal lipid content.** miRNAs levels were determined by real-time qPCR and expressed as fold change over STD (value = 1.0) after normalizing for endogenous controls. Serum cholesterol and renal lipid content were assessed by standard methods explained in the Material and Methods sections. A linear correlation analysis was performed between the miR-5099 and serum cholesterol (A); miR-5099 and renal lipid content (B); miR-551b-3p and serum cholesterol (C); miR-551b-3p and renal lipid content (D); miR-146-3p and serum cholesterol (E); miR-146-3p and renal lipid content (F); The Spearman correlation coefficient (R) and p value are shown.
