# Supplementary material for: microRNA Expression Profile in Obesity-Induced Kidney Disease Driven by High-Fat Diet in Mice
Source: Nutrients. 2024 Feb 28;16(5):691. doi: 10.3390/nu16050691 (PMC10934936; doi:10.3390/nu16050691)
Supplement: Supplementary file 1 [file nutrients-16-00691-s001.zip › Table S1.xlsx]

## Sheet: Supplementary Table S1
Term Name	Term Genes	Target Genes (n)	miRNAs (n)	miRNA Names	P-value	FDR	Table S1: KEGG analysis for biological pathways of the three significantly differentially expressed miRNAs (FDR < 0.05).
Axon guidance	182	135	3	mmu-miR-146a-3p,mmu-miR-5099,mmu-miR-551b-3p	2.89969e-10	9.77196e-08
cAMP signaling pathway	219	157	3	mmu-miR-146a-3p,mmu-miR-5099,mmu-miR-551b-3p	7.89979e-10	1.00472e-07
Pathways in cancer	555	355	3	mmu-miR-146a-3p,mmu-miR-5099,mmu-miR-551b-3p	1.12054e-09	1.00472e-07
Phospholipase D signaling pathway	151	114	3	mmu-miR-146a-3p,mmu-miR-5099,mmu-miR-551b-3p	1.19254e-09	1.00472e-07
Calcium signaling pathway	242	169	3	mmu-miR-146a-3p,mmu-miR-5099,mmu-miR-551b-3p	4.53006e-09	3.05326e-07
Proteoglycans in cancer	207	145	3	mmu-miR-146a-3p,mmu-miR-5099,mmu-miR-551b-3p	4.18656e-08	2.27731e-06
Hippo signaling pathway	160	116	3	mmu-miR-146a-3p,mmu-miR-5099,mmu-miR-551b-3p	4.73032e-08	2.27731e-06
Wnt signaling pathway	164	117	3	mmu-miR-146a-3p,mmu-miR-5099,mmu-miR-551b-3p	1.7833e-07	7.51216e-06
Signaling pathways regulating pluripotency of stem cells	142	103	3	mmu-miR-146a-3p,mmu-miR-5099,mmu-miR-551b-3p	2.57016e-07	9.62382e-06
Chemokine signaling pathway	193	134	3	mmu-miR-146a-3p,mmu-miR-5099,mmu-miR-551b-3p	3.11609e-07	1.05012e-05
Ras signaling pathway	235	159	3	mmu-miR-146a-3p,mmu-miR-5099,mmu-miR-551b-3p	3.57357e-07	1.09481e-05
Metabolic pathways	1591	911	3	mmu-miR-146a-3p,mmu-miR-5099,mmu-miR-551b-3p	4.83279e-07	1.17904e-05
MAPK signaling pathway	302	198	3	mmu-miR-146a-3p,mmu-miR-5099,mmu-miR-551b-3p	4.89808e-07	1.17904e-05
MicroRNAs in cancer	164	116	3	mmu-miR-146a-3p,mmu-miR-5099,mmu-miR-551b-3p	4.21102e-07	1.17904e-05
Morphine addiction	94	72	3	mmu-miR-146a-3p,mmu-miR-5099,mmu-miR-551b-3p	5.25547e-07	1.18073e-05
GABAergic synapse	90	69	3	mmu-miR-146a-3p,mmu-miR-5099,mmu-miR-551b-3p	8.53695e-07	1.72093e-05
Regulation of actin cytoskeleton	222	150	3	mmu-miR-146a-3p,mmu-miR-5099,mmu-miR-551b-3p	8.68123e-07	1.72093e-05
Ubiquitin mediated proteolysis	145	103	3	mmu-miR-146a-3p,mmu-miR-5099,mmu-miR-551b-3p	1.34772e-06	2.52322e-05
FoxO signaling pathway	136	97	3	mmu-miR-146a-3p,mmu-miR-5099,mmu-miR-551b-3p	2.03336e-06	3.60653e-05
Gastric cancer	151	106	3	mmu-miR-146a-3p,mmu-miR-5099,mmu-miR-551b-3p	2.35546e-06	3.96895e-05
Rap1 signaling pathway	217	145	3	mmu-miR-146a-3p,mmu-miR-5099,mmu-miR-551b-3p	3.48347e-06	5.59014e-05
Cholinergic synapse	114	82	3	mmu-miR-146a-3p,mmu-miR-5099,mmu-miR-551b-3p	7.32287e-06	0.000111845
Endocytosis	267	173	3	mmu-miR-146a-3p,mmu-miR-5099,mmu-miR-551b-3p	7.63333e-06	0.000111845
Gap junction	87	65	3	mmu-miR-146a-3p,mmu-miR-5099,mmu-miR-551b-3p	8.32294e-06	0.000116479
Melanogenesis	103	75	3	mmu-miR-146a-3p,mmu-miR-5099,mmu-miR-551b-3p	8.64089e-06	0.000116479
Focal adhesion	205	136	3	mmu-miR-146a-3p,mmu-miR-5099,mmu-miR-551b-3p	1.22892e-05	0.000159287
cGMP-PKG signaling pathway	175	118	3	mmu-miR-146a-3p,mmu-miR-5099,mmu-miR-551b-3p	1.46676e-05	0.000183073
Glutamatergic synapse	114	81	3	mmu-miR-146a-3p,mmu-miR-5099,mmu-miR-551b-3p	1.76866e-05	0.000212871
Sphingolipid signaling pathway	129	90	3	mmu-miR-146a-3p,mmu-miR-5099,mmu-miR-551b-3p	1.99195e-05	0.000223763
EGFR tyrosine kinase inhibitor resistance	82	61	3	mmu-miR-146a-3p,mmu-miR-5099,mmu-miR-551b-3p	1.98539e-05	0.000223763
Salmonella infection	253	163	3	mmu-miR-146a-3p,mmu-miR-5099,mmu-miR-551b-3p	2.23501e-05	0.000242967
Oxytocin signaling pathway	158	107	3	mmu-miR-146a-3p,mmu-miR-5099,mmu-miR-551b-3p	2.73001e-05	0.000287505
Herpes simplex virus 1 infection	453	276	3	mmu-miR-146a-3p,mmu-miR-5099,mmu-miR-551b-3p	3.02952e-05	0.000309378
Other types of O-glycan biosynthesis	44	36	3	mmu-miR-146a-3p,mmu-miR-5099,mmu-miR-551b-3p	3.12449e-05	0.000309692
PI3K-Akt signaling pathway	364	225	3	mmu-miR-146a-3p,mmu-miR-5099,mmu-miR-551b-3p	4.51705e-05	0.000434928
Relaxin signaling pathway	131	90	3	mmu-miR-146a-3p,mmu-miR-5099,mmu-miR-551b-3p	5.08333e-05	0.000475857
Growth hormone synthesis, secretion and action	118	82	3	mmu-miR-146a-3p,mmu-miR-5099,mmu-miR-551b-3p	5.77546e-05	0.000514651
ErbB signaling pathway	87	63	3	mmu-miR-146a-3p,mmu-miR-5099,mmu-miR-551b-3p	5.95591e-05	0.000514651
Adipocytokine signaling pathway	71	53	3	mmu-miR-146a-3p,mmu-miR-5099,mmu-miR-551b-3p	5.90711e-05	0.000514651
Breast cancer	150	101	3	mmu-miR-146a-3p,mmu-miR-5099,mmu-miR-551b-3p	6.50669e-05	0.000548188
Apelin signaling pathway	137	93	3	mmu-miR-146a-3p,mmu-miR-5099,mmu-miR-551b-3p	7.84177e-05	0.000644555
Autophagy - animal	144	97	3	mmu-miR-146a-3p,mmu-miR-5099,mmu-miR-551b-3p	8.80788e-05	0.000706727
Glycerophospholipid metabolism	100	70	3	mmu-miR-146a-3p,mmu-miR-5099,mmu-miR-551b-3p	0.000138676	0.00108683
Dilated cardiomyopathy	97	68	3	mmu-miR-146a-3p,mmu-miR-5099,mmu-miR-551b-3p	0.000160333	0.00122801
Mucin type O-glycan biosynthesis	28	24	3	mmu-miR-146a-3p,mmu-miR-5099,mmu-miR-551b-3p	0.000172594	0.00129254
Bile secretion	99	69	3	mmu-miR-146a-3p,mmu-miR-5099,mmu-miR-551b-3p	0.000190539	0.00139591
Adrenergic signaling in cardiomyocytes	158	104	3	mmu-miR-146a-3p,mmu-miR-5099,mmu-miR-551b-3p	0.000200933	0.00144073
Yersinia infection	136	91	3	mmu-miR-146a-3p,mmu-miR-5099,mmu-miR-551b-3p	0.000208122	0.00146119
Cushing syndrome	165	108	3	mmu-miR-146a-3p,mmu-miR-5099,mmu-miR-551b-3p	0.000212888	0.00146415
Protein processing in endoplasmic reticulum	172	112	3	mmu-miR-146a-3p,mmu-miR-5099,mmu-miR-551b-3p	0.000223533	0.00150661
Synaptic vesicle cycle	80	57	3	mmu-miR-146a-3p,mmu-miR-5099,mmu-miR-551b-3p	0.000271559	0.00179442
AMPK signaling pathway	130	87	3	mmu-miR-146a-3p,mmu-miR-5099,mmu-miR-551b-3p	0.000282203	0.00182889
Phosphatidylinositol signaling system	100	69	3	mmu-miR-146a-3p,mmu-miR-5099,mmu-miR-551b-3p	0.000305977	0.00184133
Hepatitis B	166	108	3	mmu-miR-146a-3p,mmu-miR-5099,mmu-miR-551b-3p	0.000301973	0.00184133
Peroxisome	90	63	3	mmu-miR-146a-3p,mmu-miR-5099,mmu-miR-551b-3p	0.000295651	0.00184133
Inositol phosphate metabolism	72	52	3	mmu-miR-146a-3p,mmu-miR-5099,mmu-miR-551b-3p	0.0002901	0.00184133
Circadian rhythm	30	25	3	mmu-miR-146a-3p,mmu-miR-5099,mmu-miR-551b-3p	0.000312128	0.00184539
mTOR signaling pathway	163	106	3	mmu-miR-146a-3p,mmu-miR-5099,mmu-miR-551b-3p	0.000350991	0.00203757
Choline metabolism in cancer	102	70	3	mmu-miR-146a-3p,mmu-miR-5099,mmu-miR-551b-3p	0.000356725	0.00203757
Circadian entrainment	99	68	3	mmu-miR-146a-3p,mmu-miR-5099,mmu-miR-551b-3p	0.000414721	0.00232935
Parathyroid hormone synthesis, secretion and action	111	75	3	mmu-miR-146a-3p,mmu-miR-5099,mmu-miR-551b-3p	0.000468431	0.00258789
PD-L1 expression and PD-1 checkpoint pathway in cancer	91	63	3	mmu-miR-146a-3p,mmu-miR-5099,mmu-miR-551b-3p	0.000479112	0.00260421
Pancreatic cancer	78	55	3	mmu-miR-146a-3p,mmu-miR-5099,mmu-miR-551b-3p	0.000528944	0.00282943
Regulation of lipolysis in adipocytes	57	42	3	mmu-miR-146a-3p,mmu-miR-5099,mmu-miR-551b-3p	0.000552598	0.00287497
Prostate cancer	103	70	3	mmu-miR-146a-3p,mmu-miR-5099,mmu-miR-551b-3p	0.00055452	0.00287497
Human papillomavirus infection	361	217	3	mmu-miR-146a-3p,mmu-miR-5099,mmu-miR-551b-3p	0.000621598	0.00317392
Colorectal cancer	90	62	3	mmu-miR-146a-3p,mmu-miR-5099,mmu-miR-551b-3p	0.000651825	0.00323037
Endocrine resistance	95	65	3	mmu-miR-146a-3p,mmu-miR-5099,mmu-miR-551b-3p	0.000651466	0.00323037
Nicotine addiction	40	31	3	mmu-miR-146a-3p,mmu-miR-5099,mmu-miR-551b-3p	0.000698159	0.00340985
Chronic myeloid leukemia	77	54	3	mmu-miR-146a-3p,mmu-miR-5099,mmu-miR-551b-3p	0.000732899	0.00352838
Longevity regulating pathway	92	63	3	mmu-miR-146a-3p,mmu-miR-5099,mmu-miR-551b-3p	0.000758302	0.00359927
Non-small cell lung cancer	74	52	3	mmu-miR-146a-3p,mmu-miR-5099,mmu-miR-551b-3p	0.000848746	0.0039726
Mitophagy - animal	66	47	2	mmu-miR-146a-3p,mmu-miR-5099	0.000939272	0.00433609
Adherens junction	71	50	3	mmu-miR-146a-3p,mmu-miR-5099,mmu-miR-551b-3p	0.000982572	0.00447469
TGF-beta signaling pathway	96	65	3	mmu-miR-146a-3p,mmu-miR-5099,mmu-miR-551b-3p	0.00100645	0.00452231
GnRH signaling pathway	91	62	3	mmu-miR-146a-3p,mmu-miR-5099,mmu-miR-551b-3p	0.00102107	0.00452765
Glycosaminoglycan biosynthesis - heparan sulfate / heparin	24	20	3	mmu-miR-146a-3p,mmu-miR-5099,mmu-miR-551b-3p	0.00130912	0.00572952
Insulin signaling pathway	143	92	3	mmu-miR-146a-3p,mmu-miR-5099,mmu-miR-551b-3p	0.00140327	0.00606285
Platelet activation	128	83	3	mmu-miR-146a-3p,mmu-miR-5099,mmu-miR-551b-3p	0.00167745	0.00715571
Hypertrophic cardiomyopathy	94	63	3	mmu-miR-146a-3p,mmu-miR-5099,mmu-miR-551b-3p	0.00177736	0.00748712
Renal cell carcinoma	69	48	3	mmu-miR-146a-3p,mmu-miR-5099,mmu-miR-551b-3p	0.00187444	0.00779858
Insulin resistance	115	75	3	mmu-miR-146a-3p,mmu-miR-5099,mmu-miR-551b-3p	0.00218137	0.00875146
AGE-RAGE signaling pathway in diabetic complications	103	68	3	mmu-miR-146a-3p,mmu-miR-5099,mmu-miR-551b-3p	0.00216607	0.00875146
Mannose type O-glycan biosynthesis	23	19	2	mmu-miR-146a-3p,mmu-miR-5099	0.00213722	0.00875146
Dopaminergic synapse	140	89	3	mmu-miR-146a-3p,mmu-miR-5099,mmu-miR-551b-3p	0.00281761	0.011171
Arrhythmogenic right ventricular cardiomyopathy	80	54	3	mmu-miR-146a-3p,mmu-miR-5099,mmu-miR-551b-3p	0.00290771	0.0113942
Estrogen signaling pathway	135	86	3	mmu-miR-146a-3p,mmu-miR-5099,mmu-miR-551b-3p	0.00301691	0.0116862
Neurotrophin signaling pathway	123	79	3	mmu-miR-146a-3p,mmu-miR-5099,mmu-miR-551b-3p	0.00316528	0.0119967
Hippo signaling pathway - multiple species	28	22	2	mmu-miR-146a-3p,mmu-miR-551b-3p	0.00316827	0.0119967
Hepatocellular carcinoma	181	112	3	mmu-miR-146a-3p,mmu-miR-5099,mmu-miR-551b-3p	0.0033632	0.0125933
Viral protein interaction with cytokine and cytokine receptor	94	62	3	mmu-miR-146a-3p,mmu-miR-5099,mmu-miR-551b-3p	0.00344615	0.0127621
Fatty acid metabolism	62	43	3	mmu-miR-146a-3p,mmu-miR-5099,mmu-miR-551b-3p	0.00348791	0.0127764
Basal cell carcinoma	64	44	3	mmu-miR-146a-3p,mmu-miR-5099,mmu-miR-551b-3p	0.00408296	0.0144838
Endometrial cancer	59	41	3	mmu-miR-146a-3p,mmu-miR-5099,mmu-miR-551b-3p	0.00406629	0.0144838
Longevity regulating pathway - multiple species	64	44	3	mmu-miR-146a-3p,mmu-miR-5099,mmu-miR-551b-3p	0.00408296	0.0144838
Tight junction	166	103	3	mmu-miR-146a-3p,mmu-miR-5099,mmu-miR-551b-3p	0.00425469	0.0149357
Th17 cell differentiation	105	68	3	mmu-miR-146a-3p,mmu-miR-5099,mmu-miR-551b-3p	0.00443192	0.0153975
Purine metabolism	139	87	3	mmu-miR-146a-3p,mmu-miR-5099,mmu-miR-551b-3p	0.00586451	0.0201667
Renin secretion	75	50	3	mmu-miR-146a-3p,mmu-miR-5099,mmu-miR-551b-3p	0.00599057	0.0203922
Long-term potentiation	70	47	3	mmu-miR-146a-3p,mmu-miR-5099,mmu-miR-551b-3p	0.00619959	0.0208926
Fc epsilon RI signaling pathway	67	45	3	mmu-miR-146a-3p,mmu-miR-5099,mmu-miR-551b-3p	0.00726296	0.0242338
Pentose and glucuronate interconversions	34	25	2	mmu-miR-146a-3p,mmu-miR-5099	0.00775312	0.0256157
Human T-cell leukemia virus 1 infection	244	145	3	mmu-miR-146a-3p,mmu-miR-5099,mmu-miR-551b-3p	0.00830081	0.027159
Hedgehog signaling pathway	59	40	3	mmu-miR-146a-3p,mmu-miR-5099,mmu-miR-551b-3p	0.00874668	0.0281569
Prolactin signaling pathway	76	50	3	mmu-miR-146a-3p,mmu-miR-5099,mmu-miR-551b-3p	0.00880965	0.0281569
Glycosaminoglycan biosynthesis - chondroitin sulfate / dermatan sulfate	20	16	2	mmu-miR-146a-3p,mmu-miR-5099	0.00885647	0.0281569
Long-term depression	61	41	2	mmu-miR-146a-3p,mmu-miR-5099	0.00998756	0.0314561
Melanoma	73	48	2	mmu-miR-146a-3p,mmu-miR-5099	0.0103187	0.0321981
Sphingolipid metabolism	51	35	3	mmu-miR-146a-3p,mmu-miR-5099,mmu-miR-551b-3p	0.0104253	0.0322323
Vascular smooth muscle contraction	145	89	3	mmu-miR-146a-3p,mmu-miR-5099,mmu-miR-551b-3p	0.0112928	0.0339792
Thyroid hormone signaling pathway	122	76	3	mmu-miR-146a-3p,mmu-miR-5099,mmu-miR-551b-3p	0.0112896	0.0339792
Salivary secretion	87	56	3	mmu-miR-146a-3p,mmu-miR-5099,mmu-miR-551b-3p	0.0111561	0.0339792
JAK-STAT signaling pathway	170	103	3	mmu-miR-146a-3p,mmu-miR-5099,mmu-miR-551b-3p	0.0114317	0.0340929
Measles	147	90	3	mmu-miR-146a-3p,mmu-miR-5099,mmu-miR-551b-3p	0.0119369	0.0352873
Th1 and Th2 cell differentiation	89	57	3	mmu-miR-146a-3p,mmu-miR-5099,mmu-miR-551b-3p	0.0121765	0.0356825
Bacterial invasion of epithelial cells	77	50	3	mmu-miR-146a-3p,mmu-miR-5099,mmu-miR-551b-3p	0.0126531	0.0367595
Ascorbate and aldarate metabolism	30	22	2	mmu-miR-146a-3p,mmu-miR-5099	0.012988	0.0374098
Osteoclast differentiation	128	79	3	mmu-miR-146a-3p,mmu-miR-5099,mmu-miR-551b-3p	0.0136228	0.0389057
Neuroactive ligand-receptor interaction	360	207	3	mmu-miR-146a-3p,mmu-miR-5099,mmu-miR-551b-3p	0.013768	0.0389899
Gastric acid secretion	76	49	3	mmu-miR-146a-3p,mmu-miR-5099,mmu-miR-551b-3p	0.0162618	0.045291
beta-Alanine metabolism	32	23	2	mmu-miR-146a-3p,mmu-miR-5099	0.0161986	0.045291
NF-kappa B signaling pathway	106	66	3	mmu-miR-146a-3p,mmu-miR-5099,mmu-miR-551b-3p	0.0176956	0.0482996
T cell receptor signaling pathway	106	66	3	mmu-miR-146a-3p,mmu-miR-5099,mmu-miR-551b-3p	0.0176956	0.0482996
B cell receptor signaling pathway	78	50	2	mmu-miR-146a-3p,mmu-miR-5099	0.017772	0.0482996
