# Supplementary material for: microRNA Expression Profile in Obesity-Induced Kidney Disease Driven by High-Fat Diet in Mice
Source: Nutrients. 2024 Feb 28;16(5):691. doi: 10.3390/nu16050691 (PMC10934936; doi:10.3390/nu16050691)
Supplement: Supplementary file 1 [file nutrients-16-00691-s001.zip › Table S2.xlsx]

## Sheet: Supplementary Table S2
Term Name	Term Genes	Target Genes (n)	miRNAs (n)	miRNA Names	P-value	FDR	Table S2: GO analysis for biological processes of the three significantly differentially expressed miRNAs (FDR < 0.05).
protein binding	6801	4160	3	mmu-miR-146a-3p,mmu-miR-5099,mmu-miR-551b-3p	2.75358e-116	5.11064e-112
cytoplasm	6699	3938	3	mmu-miR-146a-3p,mmu-miR-5099,mmu-miR-551b-3p	2.52294e-72	2.34128e-68
nucleus	6006	3536	3	mmu-miR-146a-3p,mmu-miR-5099,mmu-miR-551b-3p	1.43452e-63	8.87491e-60
metal ion binding	3576	2226	3	mmu-miR-146a-3p,mmu-miR-5099,mmu-miR-551b-3p	1.18833e-61	5.51387e-58
cytosol	3651	2221	3	mmu-miR-146a-3p,mmu-miR-5099,mmu-miR-551b-3p	4.01793e-50	1.49146e-46
nucleoplasm	3076	1901	3	mmu-miR-146a-3p,mmu-miR-5099,mmu-miR-551b-3p	1.76899e-48	5.47207e-45
transferase activity	1801	1157	3	mmu-miR-146a-3p,mmu-miR-5099,mmu-miR-551b-3p	6.58079e-39	1.74485e-35
Golgi apparatus	1313	871	3	mmu-miR-146a-3p,mmu-miR-5099,mmu-miR-551b-3p	1.76729e-36	4.10012e-33
positive regulation of transcription by RNA polymerase II	1184	784	3	mmu-miR-146a-3p,mmu-miR-5099,mmu-miR-551b-3p	1.95111e-32	4.02363e-29
cell junction	892	608	3	mmu-miR-146a-3p,mmu-miR-5099,mmu-miR-551b-3p	2.46629e-30	4.57744e-27
DNA binding	1844	1142	3	mmu-miR-146a-3p,mmu-miR-5099,mmu-miR-551b-3p	1.01495e-28	1.7125e-25
nucleotide binding	1816	1116	3	mmu-miR-146a-3p,mmu-miR-5099,mmu-miR-551b-3p	2.96585e-26	4.54983e-23
endosome	659	459	3	mmu-miR-146a-3p,mmu-miR-5099,mmu-miR-551b-3p	3.18685e-26	4.54983e-23
identical protein binding	1733	1066	3	mmu-miR-146a-3p,mmu-miR-5099,mmu-miR-551b-3p	2.83121e-25	3.75337e-22
endoplasmic reticulum	1509	931	3	mmu-miR-146a-3p,mmu-miR-5099,mmu-miR-551b-3p	1.16572e-22	1.44238e-19
regulation of transcription, DNA-templated	1507	928	3	mmu-miR-146a-3p,mmu-miR-5099,mmu-miR-551b-3p	3.17117e-22	3.67856e-19
intracellular membrane-bounded organelle	990	637	3	mmu-miR-146a-3p,mmu-miR-5099,mmu-miR-551b-3p	1.02288e-21	1.11674e-18
ATP binding	1524	935	3	mmu-miR-146a-3p,mmu-miR-5099,mmu-miR-551b-3p	1.09218e-21	1.12616e-18
glutamatergic synapse	405	294	3	mmu-miR-146a-3p,mmu-miR-5099,mmu-miR-551b-3p	1.89252e-21	1.8487e-18
RNA polymerase II cis-regulatory region sequence-specific DNA binding	638	431	3	mmu-miR-146a-3p,mmu-miR-5099,mmu-miR-551b-3p	1.22779e-20	1.13939e-17
Golgi membrane	499	348	3	mmu-miR-146a-3p,mmu-miR-5099,mmu-miR-551b-3p	2.62434e-20	2.31942e-17
DNA-binding transcription factor activity	796	520	3	mmu-miR-146a-3p,mmu-miR-5099,mmu-miR-551b-3p	6.97171e-20	5.88159e-17
negative regulation of transcription by RNA polymerase II	865	557	3	mmu-miR-146a-3p,mmu-miR-5099,mmu-miR-551b-3p	3.26201e-19	2.6323e-16
sequence-specific double-stranded DNA binding	523	358	3	mmu-miR-146a-3p,mmu-miR-5099,mmu-miR-551b-3p	9.35124e-19	7.23162e-16
positive regulation of transcription, DNA-templated	618	413	3	mmu-miR-146a-3p,mmu-miR-5099,mmu-miR-551b-3p	1.49703e-18	1.1114e-15
postsynaptic density	323	236	3	mmu-miR-146a-3p,mmu-miR-5099,mmu-miR-551b-3p	4.6567e-18	3.32417e-15
nervous system development	417	292	3	mmu-miR-146a-3p,mmu-miR-5099,mmu-miR-551b-3p	1.22001e-17	8.38643e-15
ion transport	629	416	3	mmu-miR-146a-3p,mmu-miR-5099,mmu-miR-551b-3p	1.7256e-17	1.14383e-14
nucleic acid binding	1371	831	3	mmu-miR-146a-3p,mmu-miR-5099,mmu-miR-551b-3p	2.23819e-17	1.43244e-14
neuronal cell body	578	386	3	mmu-miR-146a-3p,mmu-miR-5099,mmu-miR-551b-3p	2.40513e-17	1.48797e-14
protein phosphorylation	629	415	3	mmu-miR-146a-3p,mmu-miR-5099,mmu-miR-551b-3p	3.49517e-17	2.09259e-14
regulation of transcription by RNA polymerase II	692	451	3	mmu-miR-146a-3p,mmu-miR-5099,mmu-miR-551b-3p	3.98962e-17	2.24386e-14
cell projection	1045	650	3	mmu-miR-146a-3p,mmu-miR-5099,mmu-miR-551b-3p	3.89596e-17	2.24386e-14
protein homodimerization activity	675	441	3	mmu-miR-146a-3p,mmu-miR-5099,mmu-miR-551b-3p	4.75619e-17	2.59632e-14
synapse	795	509	3	mmu-miR-146a-3p,mmu-miR-5099,mmu-miR-551b-3p	5.97854e-17	3.17034e-14
perinuclear region of cytoplasm	757	486	3	mmu-miR-146a-3p,mmu-miR-5099,mmu-miR-551b-3p	1.48535e-16	7.65782e-14
dendrite	574	381	3	mmu-miR-146a-3p,mmu-miR-5099,mmu-miR-551b-3p	1.69368e-16	8.49585e-14
cytoskeleton	1274	773	3	mmu-miR-146a-3p,mmu-miR-5099,mmu-miR-551b-3p	2.27859e-16	1.11291e-13
zinc ion binding	739	475	3	mmu-miR-146a-3p,mmu-miR-5099,mmu-miR-551b-3p	2.43046e-16	1.15665e-13
cell differentiation	926	580	3	mmu-miR-146a-3p,mmu-miR-5099,mmu-miR-551b-3p	2.89448e-16	1.34304e-13
DNA-binding transcription activator activity, RNA polymerase II-specific	466	317	3	mmu-miR-146a-3p,mmu-miR-5099,mmu-miR-551b-3p	3.64913e-16	1.6519e-13
endoplasmic reticulum membrane	877	552	3	mmu-miR-146a-3p,mmu-miR-5099,mmu-miR-551b-3p	4.00084e-16	1.76799e-13
PDZ domain binding	110	95	3	mmu-miR-146a-3p,mmu-miR-5099,mmu-miR-551b-3p	5.03703e-16	2.17412e-13
kinase activity	648	421	3	mmu-miR-146a-3p,mmu-miR-5099,mmu-miR-551b-3p	9.81466e-16	4.048e-13
phosphorylation	655	425	3	mmu-miR-146a-3p,mmu-miR-5099,mmu-miR-551b-3p	9.80707e-16	4.048e-13
multicellular organism development	1044	642	3	mmu-miR-146a-3p,mmu-miR-5099,mmu-miR-551b-3p	1.98103e-15	7.99302e-13
basolateral plasma membrane	236	176	3	mmu-miR-146a-3p,mmu-miR-5099,mmu-miR-551b-3p	3.12746e-15	1.23501e-12
neuron projection	522	346	3	mmu-miR-146a-3p,mmu-miR-5099,mmu-miR-551b-3p	5.68449e-15	2.198e-12
protein ubiquitination	540	354	3	mmu-miR-146a-3p,mmu-miR-5099,mmu-miR-551b-3p	2.99039e-14	1.13269e-11
transmembrane transport	565	368	3	mmu-miR-146a-3p,mmu-miR-5099,mmu-miR-551b-3p	3.7623e-14	1.39657e-11
mitochondrion	1756	1020	3	mmu-miR-146a-3p,mmu-miR-5099,mmu-miR-551b-3p	8.02853e-14	2.92176e-11
sequence-specific DNA binding	687	434	3	mmu-miR-146a-3p,mmu-miR-5099,mmu-miR-551b-3p	2.71671e-13	9.5136e-11
protein kinase activity	551	357	3	mmu-miR-146a-3p,mmu-miR-5099,mmu-miR-551b-3p	2.68188e-13	9.5136e-11
cytoplasmic vesicle	775	483	3	mmu-miR-146a-3p,mmu-miR-5099,mmu-miR-551b-3p	3.17406e-13	1.09094e-10
apical plasma membrane	379	257	3	mmu-miR-146a-3p,mmu-miR-5099,mmu-miR-551b-3p	3.98295e-13	1.34407e-10
axon	470	309	3	mmu-miR-146a-3p,mmu-miR-5099,mmu-miR-551b-3p	7.61027e-13	2.52226e-10
intracellular signal transduction	435	288	3	mmu-miR-146a-3p,mmu-miR-5099,mmu-miR-551b-3p	1.3301e-12	4.331e-10
Wnt signaling pathway	205	150	3	mmu-miR-146a-3p,mmu-miR-5099,mmu-miR-551b-3p	4.44205e-12	1.42146e-09
positive regulation of cell migration	245	174	3	mmu-miR-146a-3p,mmu-miR-5099,mmu-miR-551b-3p	6.5635e-12	2.06472e-09
early endosome	275	192	3	mmu-miR-146a-3p,mmu-miR-5099,mmu-miR-551b-3p	6.73655e-12	2.08384e-09
negative regulation of cell population proliferation	386	257	3	mmu-miR-146a-3p,mmu-miR-5099,mmu-miR-551b-3p	8.6253e-12	2.62435e-09
RNA polymerase II regulatory region sequence-specific DNA binding	362	243	3	mmu-miR-146a-3p,mmu-miR-5099,mmu-miR-551b-3p	8.84543e-12	2.64792e-09
ubiquitin-protein transferase activity	241	171	3	mmu-miR-146a-3p,mmu-miR-5099,mmu-miR-551b-3p	1.12779e-11	3.32252e-09
protein kinase binding	522	334	3	mmu-miR-146a-3p,mmu-miR-5099,mmu-miR-551b-3p	1.61545e-11	4.68481e-09
protein transport	631	395	3	mmu-miR-146a-3p,mmu-miR-5099,mmu-miR-551b-3p	1.99948e-11	5.67831e-09
protein glycosylation	175	130	3	mmu-miR-146a-3p,mmu-miR-5099,mmu-miR-551b-3p	2.01923e-11	5.67831e-09
cell surface	659	410	3	mmu-miR-146a-3p,mmu-miR-5099,mmu-miR-551b-3p	2.83282e-11	7.84734e-09
dendritic spine	200	145	3	mmu-miR-146a-3p,mmu-miR-5099,mmu-miR-551b-3p	3.16402e-11	8.6359e-09
nuclear speck	400	262	3	mmu-miR-146a-3p,mmu-miR-5099,mmu-miR-551b-3p	7.50681e-11	2.01922e-08
intracellular protein transport	294	200	3	mmu-miR-146a-3p,mmu-miR-5099,mmu-miR-551b-3p	1.01372e-10	2.68781e-08
positive regulation of MAPK cascade	122	95	3	mmu-miR-146a-3p,mmu-miR-5099,mmu-miR-551b-3p	1.21808e-10	3.18415e-08
DNA-binding transcription factor activity, RNA polymerase II-specific	468	300	3	mmu-miR-146a-3p,mmu-miR-5099,mmu-miR-551b-3p	1.28354e-10	3.30868e-08
DNA-binding transcription repressor activity, RNA polymerase II-specific	271	186	3	mmu-miR-146a-3p,mmu-miR-5099,mmu-miR-551b-3p	1.43705e-10	3.65366e-08
transcription regulatory region sequence-specific DNA binding	300	203	3	mmu-miR-146a-3p,mmu-miR-5099,mmu-miR-551b-3p	1.52631e-10	3.82815e-08
receptor complex	206	147	3	mmu-miR-146a-3p,mmu-miR-5099,mmu-miR-551b-3p	1.58447e-10	3.92105e-08
protein C-terminus binding	233	163	3	mmu-miR-146a-3p,mmu-miR-5099,mmu-miR-551b-3p	2.00791e-10	4.90353e-08
apoptotic process	568	355	3	mmu-miR-146a-3p,mmu-miR-5099,mmu-miR-551b-3p	2.7554e-10	6.64158e-08
GTP binding	399	259	3	mmu-miR-146a-3p,mmu-miR-5099,mmu-miR-551b-3p	3.76411e-10	8.95666e-08
brain development	260	178	3	mmu-miR-146a-3p,mmu-miR-5099,mmu-miR-551b-3p	4.86545e-10	1.14307e-07
phosphoprotein phosphatase activity	143	107	3	mmu-miR-146a-3p,mmu-miR-5099,mmu-miR-551b-3p	5.80688e-10	1.3472e-07
transferase activity, transferring glycosyl groups	237	164	3	mmu-miR-146a-3p,mmu-miR-5099,mmu-miR-551b-3p	6.62374e-10	1.51774e-07
protein domain specific binding	333	220	3	mmu-miR-146a-3p,mmu-miR-5099,mmu-miR-551b-3p	7.74908e-10	1.75394e-07
protein polyubiquitination	163	119	3	mmu-miR-146a-3p,mmu-miR-5099,mmu-miR-551b-3p	8.90421e-10	1.99111e-07
postsynaptic membrane	211	148	3	mmu-miR-146a-3p,mmu-miR-5099,mmu-miR-551b-3p	1.00334e-09	2.21691e-07
protein dephosphorylation	175	126	3	mmu-miR-146a-3p,mmu-miR-5099,mmu-miR-551b-3p	1.26049e-09	2.75231e-07
positive regulation of GTPase activity	313	207	3	mmu-miR-146a-3p,mmu-miR-5099,mmu-miR-551b-3p	2.13186e-09	4.60085e-07
peptidyl-tyrosine dephosphorylation	96	76	3	mmu-miR-146a-3p,mmu-miR-5099,mmu-miR-551b-3p	2.21675e-09	4.72907e-07
symporter activity	110	85	3	mmu-miR-146a-3p,mmu-miR-5099,mmu-miR-551b-3p	2.27365e-09	4.79534e-07
ion channel activity	183	130	3	mmu-miR-146a-3p,mmu-miR-5099,mmu-miR-551b-3p	2.84857e-09	5.94039e-07
chromatin binding	498	311	3	mmu-miR-146a-3p,mmu-miR-5099,mmu-miR-551b-3p	3.94104e-09	8.1273e-07
protein serine/threonine kinase activity	424	269	3	mmu-miR-146a-3p,mmu-miR-5099,mmu-miR-551b-3p	5.07006e-09	1.03407e-06
endocytosis	226	155	3	mmu-miR-146a-3p,mmu-miR-5099,mmu-miR-551b-3p	5.17947e-09	1.0449e-06
GTPase activity	312	205	3	mmu-miR-146a-3p,mmu-miR-5099,mmu-miR-551b-3p	5.73597e-09	1.12063e-06
protein-containing complex	869	514	3	mmu-miR-146a-3p,mmu-miR-5099,mmu-miR-551b-3p	5.73534e-09	1.12063e-06
angiogenesis	250	169	3	mmu-miR-146a-3p,mmu-miR-5099,mmu-miR-551b-3p	5.71519e-09	1.12063e-06
enzyme binding	439	277	3	mmu-miR-146a-3p,mmu-miR-5099,mmu-miR-551b-3p	6.58496e-09	1.27309e-06
regulation of GTPase activity	85	68	3	mmu-miR-146a-3p,mmu-miR-5099,mmu-miR-551b-3p	6.9304e-09	1.32606e-06
protein autophosphorylation	178	126	3	mmu-miR-146a-3p,mmu-miR-5099,mmu-miR-551b-3p	7.06195e-09	1.33745e-06
ubiquitin protein ligase activity	284	188	3	mmu-miR-146a-3p,mmu-miR-5099,mmu-miR-551b-3p	1.02697e-08	1.92531e-06
endomembrane system	141	103	3	mmu-miR-146a-3p,mmu-miR-5099,mmu-miR-551b-3p	1.12448e-08	2.08703e-06
protein O-linked glycosylation	31	30	3	mmu-miR-146a-3p,mmu-miR-5099,mmu-miR-551b-3p	1.17418e-08	2.1577e-06
lipid metabolic process	537	330	3	mmu-miR-146a-3p,mmu-miR-5099,mmu-miR-551b-3p	1.6268e-08	2.9314e-06
endosome membrane	203	140	3	mmu-miR-146a-3p,mmu-miR-5099,mmu-miR-551b-3p	1.61616e-08	2.9314e-06
GTPase activator activity	234	158	3	mmu-miR-146a-3p,mmu-miR-5099,mmu-miR-551b-3p	1.99861e-08	3.56675e-06
heart development	267	177	3	mmu-miR-146a-3p,mmu-miR-5099,mmu-miR-551b-3p	2.3397e-08	4.13569e-06
axon guidance	177	124	3	mmu-miR-146a-3p,mmu-miR-5099,mmu-miR-551b-3p	2.49283e-08	4.35386e-06
transmembrane receptor protein tyrosine kinase signaling pathway	110	83	3	mmu-miR-146a-3p,mmu-miR-5099,mmu-miR-551b-3p	2.51004e-08	4.35386e-06
ubiquitin-dependent protein catabolic process	283	186	3	mmu-miR-146a-3p,mmu-miR-5099,mmu-miR-551b-3p	2.77075e-08	4.76159e-06
actin cytoskeleton organization	189	131	3	mmu-miR-146a-3p,mmu-miR-5099,mmu-miR-551b-3p	2.87151e-08	4.88947e-06
SH3 domain binding	125	92	3	mmu-miR-146a-3p,mmu-miR-5099,mmu-miR-551b-3p	3.67264e-08	6.09584e-06
potassium ion transport	138	100	3	mmu-miR-146a-3p,mmu-miR-5099,mmu-miR-551b-3p	3.64712e-08	6.09584e-06
protein tyrosine phosphatase activity	101	77	3	mmu-miR-146a-3p,mmu-miR-5099,mmu-miR-551b-3p	3.67852e-08	6.09584e-06
adherens junction	153	109	3	mmu-miR-146a-3p,mmu-miR-5099,mmu-miR-551b-3p	4.12479e-08	6.77488e-06
actin binding	385	243	3	mmu-miR-146a-3p,mmu-miR-5099,mmu-miR-551b-3p	5.26374e-08	8.56974e-06
focal adhesion	182	126	3	mmu-miR-146a-3p,mmu-miR-5099,mmu-miR-551b-3p	5.83744e-08	9.42113e-06
membrane raft	294	191	3	mmu-miR-146a-3p,mmu-miR-5099,mmu-miR-551b-3p	6.69568e-08	1.06215e-05
Rab GTPase binding	139	100	3	mmu-miR-146a-3p,mmu-miR-5099,mmu-miR-551b-3p	6.66472e-08	1.06215e-05
regulation of cell shape	151	107	3	mmu-miR-146a-3p,mmu-miR-5099,mmu-miR-551b-3p	8.62618e-08	1.3568e-05
wound healing	107	80	3	mmu-miR-146a-3p,mmu-miR-5099,mmu-miR-551b-3p	8.95429e-08	1.39657e-05
recycling endosome	133	96	3	mmu-miR-146a-3p,mmu-miR-5099,mmu-miR-551b-3p	9.32533e-08	1.44232e-05
memory	104	78	3	mmu-miR-146a-3p,mmu-miR-5099,mmu-miR-551b-3p	1.0305e-07	1.58067e-05
cell-cell adhesion	153	108	3	mmu-miR-146a-3p,mmu-miR-5099,mmu-miR-551b-3p	1.04076e-07	1.58332e-05
protein homooligomerization	114	84	3	mmu-miR-146a-3p,mmu-miR-5099,mmu-miR-551b-3p	1.30921e-07	1.97553e-05
dephosphorylation	174	120	3	mmu-miR-146a-3p,mmu-miR-5099,mmu-miR-551b-3p	1.66817e-07	2.49687e-05
centrosome	514	312	3	mmu-miR-146a-3p,mmu-miR-5099,mmu-miR-551b-3p	2.16692e-07	3.21744e-05
positive regulation of synapse assembly	69	55	3	mmu-miR-146a-3p,mmu-miR-5099,mmu-miR-551b-3p	2.42987e-07	3.57924e-05
phosphatase activity	133	95	3	mmu-miR-146a-3p,mmu-miR-5099,mmu-miR-551b-3p	2.45692e-07	3.59059e-05
protein-containing complex binding	616	367	3	mmu-miR-146a-3p,mmu-miR-5099,mmu-miR-551b-3p	3.12804e-07	4.53565e-05
Golgi organization	96	72	3	mmu-miR-146a-3p,mmu-miR-5099,mmu-miR-551b-3p	3.17286e-07	4.56499e-05
response to drug	341	215	3	mmu-miR-146a-3p,mmu-miR-5099,mmu-miR-551b-3p	3.39074e-07	4.84093e-05
extracellular matrix organization	162	112	3	mmu-miR-146a-3p,mmu-miR-5099,mmu-miR-551b-3p	3.48371e-07	4.93569e-05
hydrolase activity	1715	950	3	mmu-miR-146a-3p,mmu-miR-5099,mmu-miR-551b-3p	3.65987e-07	5.146e-05
positive regulation of neuron projection development	169	116	3	mmu-miR-146a-3p,mmu-miR-5099,mmu-miR-551b-3p	3.93981e-07	5.49796e-05
positive regulation of apoptotic process	365	228	3	mmu-miR-146a-3p,mmu-miR-5099,mmu-miR-551b-3p	4.3848e-07	6.07327e-05
small GTPase mediated signal transduction	103	76	3	mmu-miR-146a-3p,mmu-miR-5099,mmu-miR-551b-3p	4.6785e-07	6.43208e-05
integral component of presynaptic membrane	76	59	3	mmu-miR-146a-3p,mmu-miR-5099,mmu-miR-551b-3p	4.85154e-07	6.5726e-05
transcription coactivator activity	207	138	3	mmu-miR-146a-3p,mmu-miR-5099,mmu-miR-551b-3p	4.8283e-07	6.5726e-05
exocytosis	108	79	3	mmu-miR-146a-3p,mmu-miR-5099,mmu-miR-551b-3p	5.11372e-07	6.87758e-05
nuclear body	314	199	3	mmu-miR-146a-3p,mmu-miR-5099,mmu-miR-551b-3p	5.37068e-07	7.11999e-05
protein autoubiquitination	73	57	3	mmu-miR-146a-3p,mmu-miR-5099,mmu-miR-551b-3p	5.35088e-07	7.11999e-05
cell migration	256	166	3	mmu-miR-146a-3p,mmu-miR-5099,mmu-miR-551b-3p	5.63831e-07	7.42177e-05
ion transmembrane transport	180	122	3	mmu-miR-146a-3p,mmu-miR-5099,mmu-miR-551b-3p	5.77831e-07	7.55249e-05
regulation of membrane potential	105	77	3	mmu-miR-146a-3p,mmu-miR-5099,mmu-miR-551b-3p	5.99533e-07	7.78135e-05
cell-cell junction	213	141	3	mmu-miR-146a-3p,mmu-miR-5099,mmu-miR-551b-3p	6.8143e-07	8.78288e-05
manganese ion binding	61	49	3	mmu-miR-146a-3p,mmu-miR-5099,mmu-miR-551b-3p	7.18165e-07	9.19251e-05
potassium ion transmembrane transport	145	101	3	mmu-miR-146a-3p,mmu-miR-5099,mmu-miR-551b-3p	7.40076e-07	9.40809e-05
positive regulation of canonical Wnt signaling pathway	101	74	3	mmu-miR-146a-3p,mmu-miR-5099,mmu-miR-551b-3p	1.04897e-06	0.000132441
negative regulation of ERK1 and ERK2 cascade	85	64	3	mmu-miR-146a-3p,mmu-miR-5099,mmu-miR-551b-3p	1.1254e-06	0.000141131
positive regulation of kinase activity	60	48	3	mmu-miR-146a-3p,mmu-miR-5099,mmu-miR-551b-3p	1.17128e-06	0.000145899
recycling endosome membrane	74	57	3	mmu-miR-146a-3p,mmu-miR-5099,mmu-miR-551b-3p	1.20205e-06	0.000148733
ubiquitin ligase complex	98	72	3	mmu-miR-146a-3p,mmu-miR-5099,mmu-miR-551b-3p	1.22896e-06	0.000151057
cortical actin cytoskeleton organization	28	26	2	mmu-miR-146a-3p,mmu-miR-5099	1.24719e-06	0.000152289
protein localization to plasma membrane	153	105	3	mmu-miR-146a-3p,mmu-miR-5099,mmu-miR-551b-3p	1.39351e-06	0.000169043
peptidyl-tyrosine phosphorylation	138	96	3	mmu-miR-146a-3p,mmu-miR-5099,mmu-miR-551b-3p	1.5127e-06	0.00018231
positive regulation of neuron differentiation	105	76	3	mmu-miR-146a-3p,mmu-miR-5099,mmu-miR-551b-3p	1.66506e-06	0.000199378
extracellular matrix	254	163	3	mmu-miR-146a-3p,mmu-miR-5099,mmu-miR-551b-3p	1.83917e-06	0.000217421
axonogenesis	97	71	3	mmu-miR-146a-3p,mmu-miR-5099,mmu-miR-551b-3p	1.83599e-06	0.000217421
negative chemotaxis	41	35	3	mmu-miR-146a-3p,mmu-miR-5099,mmu-miR-551b-3p	1.91465e-06	0.000224911
late endosome	152	104	3	mmu-miR-146a-3p,mmu-miR-5099,mmu-miR-551b-3p	1.94592e-06	0.000227147
cell cycle	597	352	3	mmu-miR-146a-3p,mmu-miR-5099,mmu-miR-551b-3p	2.16958e-06	0.000250317
transmembrane signaling receptor activity	183	122	3	mmu-miR-146a-3p,mmu-miR-5099,mmu-miR-551b-3p	2.17139e-06	0.000250317
GABA-ergic synapse	78	59	3	mmu-miR-146a-3p,mmu-miR-5099,mmu-miR-551b-3p	2.26785e-06	0.000258229
regulation of actin cytoskeleton organization	78	59	3	mmu-miR-146a-3p,mmu-miR-5099,mmu-miR-551b-3p	2.26785e-06	0.000258229
syntaxin binding	67	52	3	mmu-miR-146a-3p,mmu-miR-5099,mmu-miR-551b-3p	2.35146e-06	0.000264503
dendritic shaft	67	52	3	mmu-miR-146a-3p,mmu-miR-5099,mmu-miR-551b-3p	2.35146e-06	0.000264503
integral component of postsynaptic membrane	64	50	3	mmu-miR-146a-3p,mmu-miR-5099,mmu-miR-551b-3p	2.59842e-06	0.000290522
actin filament binding	201	132	3	mmu-miR-146a-3p,mmu-miR-5099,mmu-miR-551b-3p	2.90177e-06	0.000318679
vesicle-mediated transport	250	160	3	mmu-miR-146a-3p,mmu-miR-5099,mmu-miR-551b-3p	2.88595e-06	0.000318679
guanyl-nucleotide exchange factor activity	201	132	3	mmu-miR-146a-3p,mmu-miR-5099,mmu-miR-551b-3p	2.90177e-06	0.000318679
host cell nucleus	189	125	3	mmu-miR-146a-3p,mmu-miR-5099,mmu-miR-551b-3p	3.0611e-06	0.0003342
transcription factor complex	261	166	3	mmu-miR-146a-3p,mmu-miR-5099,mmu-miR-551b-3p	3.31311e-06	0.000359599
presynapse	160	108	3	mmu-miR-146a-3p,mmu-miR-5099,mmu-miR-551b-3p	3.38383e-06	0.000365139
transmembrane receptor protein tyrosine kinase activity	52	42	3	mmu-miR-146a-3p,mmu-miR-5099,mmu-miR-551b-3p	3.45996e-06	0.000371196
growth cone	179	119	3	mmu-miR-146a-3p,mmu-miR-5099,mmu-miR-551b-3p	3.55696e-06	0.000379192
cytoplasmic vesicle membrane	155	105	3	mmu-miR-146a-3p,mmu-miR-5099,mmu-miR-551b-3p	3.57535e-06	0.000379192
neuron migration	123	86	3	mmu-miR-146a-3p,mmu-miR-5099,mmu-miR-551b-3p	3.77092e-06	0.00039766
presynaptic membrane	82	61	3	mmu-miR-146a-3p,mmu-miR-5099,mmu-miR-551b-3p	3.9898e-06	0.000418366
trans-Golgi network	202	132	3	mmu-miR-146a-3p,mmu-miR-5099,mmu-miR-551b-3p	4.29094e-06	0.000447415
exocytic vesicle	26	24	2	mmu-miR-146a-3p,mmu-miR-5099	4.38896e-06	0.000455079
beta-catenin binding	87	64	3	mmu-miR-146a-3p,mmu-miR-5099,mmu-miR-551b-3p	4.42421e-06	0.000456185
sodium ion transport	120	84	3	mmu-miR-146a-3p,mmu-miR-5099,mmu-miR-551b-3p	4.5242e-06	0.000463918
transcription factor binding	395	240	3	mmu-miR-146a-3p,mmu-miR-5099,mmu-miR-551b-3p	4.70856e-06	0.00048017
neuron differentiation	166	111	3	mmu-miR-146a-3p,mmu-miR-5099,mmu-miR-551b-3p	4.94026e-06	0.000501045
chloride transmembrane transport	97	70	3	mmu-miR-146a-3p,mmu-miR-5099,mmu-miR-551b-3p	5.05914e-06	0.000510314
nuclear chromatin	266	168	3	mmu-miR-146a-3p,mmu-miR-5099,mmu-miR-551b-3p	5.36426e-06	0.000535457
calcium ion transmembrane transport	122	85	3	mmu-miR-146a-3p,mmu-miR-5099,mmu-miR-551b-3p	5.36611e-06	0.000535457
protein tyrosine kinase activity	117	82	3	mmu-miR-146a-3p,mmu-miR-5099,mmu-miR-551b-3p	5.42673e-06	0.00053861
cellular response to DNA damage stimulus	476	284	3	mmu-miR-146a-3p,mmu-miR-5099,mmu-miR-551b-3p	5.56675e-06	0.000549569
lysosome	405	245	3	mmu-miR-146a-3p,mmu-miR-5099,mmu-miR-551b-3p	5.95781e-06	0.000585063
rhythmic process	146	99	3	mmu-miR-146a-3p,mmu-miR-5099,mmu-miR-551b-3p	6.28462e-06	0.000613908
positive regulation of gene expression	508	301	3	mmu-miR-146a-3p,mmu-miR-5099,mmu-miR-551b-3p	6.61711e-06	0.000643003
cell morphogenesis	91	66	3	mmu-miR-146a-3p,mmu-miR-5099,mmu-miR-551b-3p	7.08572e-06	0.000684953
nucleolus	812	464	3	mmu-miR-146a-3p,mmu-miR-5099,mmu-miR-551b-3p	7.2607e-06	0.000698231
regulation of ion transmembrane transport	138	94	3	mmu-miR-146a-3p,mmu-miR-5099,mmu-miR-551b-3p	7.97026e-06	0.000762515
protein heterodimerization activity	359	219	3	mmu-miR-146a-3p,mmu-miR-5099,mmu-miR-551b-3p	8.19963e-06	0.000780437
transforming growth factor beta receptor signaling pathway	80	59	3	mmu-miR-146a-3p,mmu-miR-5099,mmu-miR-551b-3p	9.09842e-06	0.000854055
PML body	98	70	3	mmu-miR-146a-3p,mmu-miR-5099,mmu-miR-551b-3p	9.12635e-06	0.000854055
mRNA processing	363	221	3	mmu-miR-146a-3p,mmu-miR-5099,mmu-miR-551b-3p	9.06196e-06	0.000854055
calcium ion transport	140	95	2	mmu-miR-146a-3p,mmu-miR-5099	9.15717e-06	0.000854055
integral component of endoplasmic reticulum membrane	103	73	3	mmu-miR-146a-3p,mmu-miR-5099,mmu-miR-551b-3p	9.29882e-06	0.000862931
peptidyl-serine phosphorylation	166	110	3	mmu-miR-146a-3p,mmu-miR-5099,mmu-miR-551b-3p	1.02333e-05	0.000944924
hemopoiesis	77	57	3	mmu-miR-146a-3p,mmu-miR-5099,mmu-miR-551b-3p	1.06285e-05	0.000976558
peroxisome	137	93	3	mmu-miR-146a-3p,mmu-miR-5099,mmu-miR-551b-3p	1.1055e-05	0.00100579
voltage-gated ion channel activity	137	93	3	mmu-miR-146a-3p,mmu-miR-5099,mmu-miR-551b-3p	1.1055e-05	0.00100579
ion channel binding	144	97	3	mmu-miR-146a-3p,mmu-miR-5099,mmu-miR-551b-3p	1.19424e-05	0.00108123
cadherin binding	66	50	3	mmu-miR-146a-3p,mmu-miR-5099,mmu-miR-551b-3p	1.24433e-05	0.00111569
neural tube closure	87	63	3	mmu-miR-146a-3p,mmu-miR-5099,mmu-miR-551b-3p	1.23884e-05	0.00111569
postsynapse	151	101	3	mmu-miR-146a-3p,mmu-miR-5099,mmu-miR-551b-3p	1.26994e-05	0.00113318
potassium channel activity	84	61	3	mmu-miR-146a-3p,mmu-miR-5099,mmu-miR-551b-3p	1.4654e-05	0.00130133
lamellipodium assembly	34	29	2	mmu-miR-146a-3p,mmu-miR-5099	1.58278e-05	0.00139888
nuclear receptor activity	40	33	3	mmu-miR-146a-3p,mmu-miR-5099,mmu-miR-551b-3p	1.70382e-05	0.00149871
cell cortex	176	115	3	mmu-miR-146a-3p,mmu-miR-5099,mmu-miR-551b-3p	1.73854e-05	0.0015188
cytoskeleton organization	138	93	3	mmu-miR-146a-3p,mmu-miR-5099,mmu-miR-551b-3p	1.74302e-05	0.0015188
apical part of cell	116	80	3	mmu-miR-146a-3p,mmu-miR-5099,mmu-miR-551b-3p	1.82607e-05	0.00158373
nuclear matrix	106	74	3	mmu-miR-146a-3p,mmu-miR-5099,mmu-miR-551b-3p	1.9124e-05	0.00165089
ubiquitin protein ligase binding	308	189	3	mmu-miR-146a-3p,mmu-miR-5099,mmu-miR-551b-3p	2.0017e-05	0.00171998
antiporter activity	54	42	3	mmu-miR-146a-3p,mmu-miR-5099,mmu-miR-551b-3p	2.02204e-05	0.00172945
transmembrane transporter activity	224	142	3	mmu-miR-146a-3p,mmu-miR-5099,mmu-miR-551b-3p	2.09645e-05	0.00178487
lamellipodium	187	121	3	mmu-miR-146a-3p,mmu-miR-5099,mmu-miR-551b-3p	2.11307e-05	0.0017908
negative regulation of translation	83	60	3	mmu-miR-146a-3p,mmu-miR-5099,mmu-miR-551b-3p	2.16663e-05	0.00182785
neuron development	62	47	3	mmu-miR-146a-3p,mmu-miR-5099,mmu-miR-551b-3p	2.20025e-05	0.00184782
cell division	372	224	3	mmu-miR-146a-3p,mmu-miR-5099,mmu-miR-551b-3p	2.25291e-05	0.00188351
chromatin remodeling	103	72	3	mmu-miR-146a-3p,mmu-miR-5099,mmu-miR-551b-3p	2.29838e-05	0.00191292
animal organ morphogenesis	125	85	3	mmu-miR-146a-3p,mmu-miR-5099,mmu-miR-551b-3p	2.35065e-05	0.00194768
modulation of chemical synaptic transmission	75	55	3	mmu-miR-146a-3p,mmu-miR-5099,mmu-miR-551b-3p	2.40194e-05	0.00198134
phospholipid biosynthetic process	59	45	3	mmu-miR-146a-3p,mmu-miR-5099,mmu-miR-551b-3p	2.51003e-05	0.00206133
SNARE binding	67	50	3	mmu-miR-146a-3p,mmu-miR-5099,mmu-miR-551b-3p	2.54044e-05	0.00207712
dendrite morphogenesis	45	36	3	mmu-miR-146a-3p,mmu-miR-5099,mmu-miR-551b-3p	2.62382e-05	0.00212656
protein tyrosine/serine/threonine phosphatase activity	45	36	3	mmu-miR-146a-3p,mmu-miR-5099,mmu-miR-551b-3p	2.62382e-05	0.00212656
negative regulation of gene expression	291	179	3	mmu-miR-146a-3p,mmu-miR-5099,mmu-miR-551b-3p	2.68361e-05	0.00216555
caveola	90	64	3	mmu-miR-146a-3p,mmu-miR-5099,mmu-miR-551b-3p	2.74838e-05	0.00219699
ATPase binding	100	70	3	mmu-miR-146a-3p,mmu-miR-5099,mmu-miR-551b-3p	2.76175e-05	0.00219699
chondrocyte differentiation	42	34	3	mmu-miR-146a-3p,mmu-miR-5099,mmu-miR-551b-3p	2.76991e-05	0.00219699
activation of GTPase activity	90	64	3	mmu-miR-146a-3p,mmu-miR-5099,mmu-miR-551b-3p	2.74838e-05	0.00219699
SMAD binding	56	43	3	mmu-miR-146a-3p,mmu-miR-5099,mmu-miR-551b-3p	2.84486e-05	0.00224683
catalytic activity	504	295	3	mmu-miR-146a-3p,mmu-miR-5099,mmu-miR-551b-3p	3.0519e-05	0.00240014
positive regulation of phosphatidylinositol 3-kinase signaling	69	51	3	mmu-miR-146a-3p,mmu-miR-5099,mmu-miR-551b-3p	3.30444e-05	0.00258778
focal adhesion assembly	26	23	3	mmu-miR-146a-3p,mmu-miR-5099,mmu-miR-551b-3p	3.74067e-05	0.00291709
activation of protein kinase activity	66	49	3	mmu-miR-146a-3p,mmu-miR-5099,mmu-miR-551b-3p	3.86007e-05	0.00299761
positive regulation of MAP kinase activity	58	44	3	mmu-miR-146a-3p,mmu-miR-5099,mmu-miR-551b-3p	3.89661e-05	0.00301338
neural crest cell migration	47	37	3	mmu-miR-146a-3p,mmu-miR-5099,mmu-miR-551b-3p	3.92824e-05	0.00302523
negative regulation of transcription, DNA-templated	634	364	3	mmu-miR-146a-3p,mmu-miR-5099,mmu-miR-551b-3p	3.98405e-05	0.00305553
autophagy	180	116	3	mmu-miR-146a-3p,mmu-miR-5099,mmu-miR-551b-3p	4.041e-05	0.00308646
early endosome membrane	128	86	3	mmu-miR-146a-3p,mmu-miR-5099,mmu-miR-551b-3p	4.22839e-05	0.00321635
synapse assembly	55	42	3	mmu-miR-146a-3p,mmu-miR-5099,mmu-miR-551b-3p	4.44607e-05	0.00335983
protein stabilization	175	113	3	mmu-miR-146a-3p,mmu-miR-5099,mmu-miR-551b-3p	4.45323e-05	0.00335983
GDP binding	76	55	2	mmu-miR-146a-3p,mmu-miR-5099	4.49901e-05	0.003367
positive regulation of protein phosphorylation	221	139	3	mmu-miR-146a-3p,mmu-miR-5099,mmu-miR-551b-3p	4.48454e-05	0.003367
adipose tissue development	35	29	2	mmu-miR-146a-3p,mmu-miR-5099	4.8341e-05	0.00360325
kinase binding	113	77	3	mmu-miR-146a-3p,mmu-miR-5099,mmu-miR-551b-3p	5.00745e-05	0.00371753
diacylglycerol metabolic process	14	14	2	mmu-miR-146a-3p,mmu-miR-5099	5.46792e-05	0.00404321
neuromuscular process controlling balance	57	43	3	mmu-miR-146a-3p,mmu-miR-5099,mmu-miR-551b-3p	6.01908e-05	0.0044331
retinal ganglion cell axon guidance	18	17	2	mmu-miR-146a-3p,mmu-miR-5099	6.38161e-05	0.0046631
long-term synaptic depression	18	17	2	mmu-miR-146a-3p,mmu-miR-5099	6.38161e-05	0.0046631
negative regulation of neuron apoptotic process	169	109	3	mmu-miR-146a-3p,mmu-miR-5099,mmu-miR-551b-3p	6.46589e-05	0.00470615
negative regulation of axon extension involved in axon guidance	25	22	3	mmu-miR-146a-3p,mmu-miR-5099,mmu-miR-551b-3p	6.71089e-05	0.0048654
cell adhesion	577	332	3	mmu-miR-146a-3p,mmu-miR-5099,mmu-miR-551b-3p	6.76598e-05	0.00488625
endoplasmic reticulum-Golgi intermediate compartment	80	57	3	mmu-miR-146a-3p,mmu-miR-5099,mmu-miR-551b-3p	6.823e-05	0.00490833
positive regulation of vasoconstriction	43	34	3	mmu-miR-146a-3p,mmu-miR-5099,mmu-miR-551b-3p	6.90818e-05	0.00495041
neuron projection development	157	102	3	mmu-miR-146a-3p,mmu-miR-5099,mmu-miR-551b-3p	7.13676e-05	0.00509455
phosphoprotein binding	51	39	2	mmu-miR-146a-3p,mmu-miR-5099	7.8898e-05	0.00552584
positive regulation of epithelial cell proliferation	72	52	3	mmu-miR-146a-3p,mmu-miR-5099,mmu-miR-551b-3p	7.88938e-05	0.00552584
regulation of postsynaptic membrane potential	51	39	3	mmu-miR-146a-3p,mmu-miR-5099,mmu-miR-551b-3p	7.8898e-05	0.00552584
voltage-gated potassium channel complex	72	52	3	mmu-miR-146a-3p,mmu-miR-5099,mmu-miR-551b-3p	7.88938e-05	0.00552584
neuron projection morphogenesis	72	52	3	mmu-miR-146a-3p,mmu-miR-5099,mmu-miR-551b-3p	7.88938e-05	0.00552584
Rac GTPase binding	59	44	3	mmu-miR-146a-3p,mmu-miR-5099,mmu-miR-551b-3p	7.9639e-05	0.00555677
nuclear membrane	239	148	3	mmu-miR-146a-3p,mmu-miR-5099,mmu-miR-551b-3p	8.02946e-05	0.00558153
sphingolipid biosynthetic process	31	26	3	mmu-miR-146a-3p,mmu-miR-5099,mmu-miR-551b-3p	8.09222e-05	0.00560416
thiol-dependent ubiquitin-specific protease activity	92	64	3	mmu-miR-146a-3p,mmu-miR-5099,mmu-miR-551b-3p	8.1246e-05	0.00560567
signaling receptor binding	372	221	3	mmu-miR-146a-3p,mmu-miR-5099,mmu-miR-551b-3p	8.3823e-05	0.00576205
negative regulation of cell migration	121	81	3	mmu-miR-146a-3p,mmu-miR-5099,mmu-miR-551b-3p	8.47693e-05	0.00580561
regulation of circadian rhythm	64	47	3	mmu-miR-146a-3p,mmu-miR-5099,mmu-miR-551b-3p	8.78314e-05	0.0059932
negative regulation of canonical Wnt signaling pathway	128	85	3	mmu-miR-146a-3p,mmu-miR-5099,mmu-miR-551b-3p	8.88021e-05	0.00603724
proteasome-mediated ubiquitin-dependent protein catabolic process	177	113	3	mmu-miR-146a-3p,mmu-miR-5099,mmu-miR-551b-3p	9.08016e-05	0.00615065
Golgi to plasma membrane transport	21	19	3	mmu-miR-146a-3p,mmu-miR-5099,mmu-miR-551b-3p	9.65224e-05	0.00651439
retrograde transport, endosome to Golgi	74	53	3	mmu-miR-146a-3p,mmu-miR-5099,mmu-miR-551b-3p	9.73699e-05	0.00654777
heterophilic cell-cell adhesion via plasma membrane cell adhesion molecules	45	35	3	mmu-miR-146a-3p,mmu-miR-5099,mmu-miR-551b-3p	0.000100255	0.00669331
phosphotyrosine residue binding	45	35	3	mmu-miR-146a-3p,mmu-miR-5099,mmu-miR-551b-3p	0.000100255	0.00669331
microtubule cytoskeleton	172	110	3	mmu-miR-146a-3p,mmu-miR-5099,mmu-miR-551b-3p	0.000100658	0.00669611
multicellular organism growth	101	69	3	mmu-miR-146a-3p,mmu-miR-5099,mmu-miR-551b-3p	0.000106908	0.00708649
pathway-restricted SMAD protein phosphorylation	13	13	3	mmu-miR-146a-3p,mmu-miR-5099,mmu-miR-551b-3p	0.000110253	0.0072564
bile acid signaling pathway	13	13	3	mmu-miR-146a-3p,mmu-miR-5099,mmu-miR-551b-3p	0.000110253	0.0072564
microtubule organizing center	342	204	3	mmu-miR-146a-3p,mmu-miR-5099,mmu-miR-551b-3p	0.000111301	0.00729948
positive regulation of I-kappaB kinase/NF-kappaB signaling	139	91	3	mmu-miR-146a-3p,mmu-miR-5099,mmu-miR-551b-3p	0.000113078	0.00738992
endoplasmic reticulum tubular network	17	16	3	mmu-miR-146a-3p,mmu-miR-5099,mmu-miR-551b-3p	0.00012191	0.00788382
Rho guanyl-nucleotide exchange factor activity	39	31	2	mmu-miR-146a-3p,mmu-miR-5099	0.000121511	0.00788382
axolemma	17	16	3	mmu-miR-146a-3p,mmu-miR-5099,mmu-miR-551b-3p	0.00012191	0.00788382
positive regulation of protein secretion	50	38	3	mmu-miR-146a-3p,mmu-miR-5099,mmu-miR-551b-3p	0.000122904	0.00791976
actin filament organization	134	88	2	mmu-miR-146a-3p,mmu-miR-5099	0.000123319	0.00791976
endoplasmic reticulum lumen	115	77	3	mmu-miR-146a-3p,mmu-miR-5099,mmu-miR-551b-3p	0.000124188	0.00794802
ubiquitin conjugating enzyme binding	36	29	3	mmu-miR-146a-3p,mmu-miR-5099,mmu-miR-551b-3p	0.000130321	0.00831188
nuclear receptor binding	27	23	3	mmu-miR-146a-3p,mmu-miR-5099,mmu-miR-551b-3p	0.000133133	0.00846218
integrin binding	129	85	3	mmu-miR-146a-3p,mmu-miR-5099,mmu-miR-551b-3p	0.00013416	0.00849832
thiol-dependent ubiquitinyl hydrolase activity	93	64	3	mmu-miR-146a-3p,mmu-miR-5099,mmu-miR-551b-3p	0.000134708	0.00850402
cochlea development	33	27	2	mmu-miR-146a-3p,mmu-miR-5099	0.00013635	0.00857848
positive regulation of macroautophagy	30	25	2	mmu-miR-146a-3p,mmu-miR-5099	0.000137949	0.00859175
regulation of cell cycle	143	93	2	mmu-miR-146a-3p,mmu-miR-5099	0.000137771	0.00859175
ephrin receptor binding	30	25	2	mmu-miR-146a-3p,mmu-miR-5099	0.000137949	0.00859175
sodium ion transmembrane transport	68	49	3	mmu-miR-146a-3p,mmu-miR-5099,mmu-miR-551b-3p	0.000138429	0.00859277
cellular response to leukemia inhibitory factor	117	78	3	mmu-miR-146a-3p,mmu-miR-5099,mmu-miR-551b-3p	0.000140113	0.00865138
regulation of phosphoprotein phosphatase activity	47	36	3	mmu-miR-146a-3p,mmu-miR-5099,mmu-miR-551b-3p	0.000140305	0.00865138
positive regulation of protein catabolic process	73	52	3	mmu-miR-146a-3p,mmu-miR-5099,mmu-miR-551b-3p	0.000142212	0.0087111
filopodium	83	58	2	mmu-miR-146a-3p,mmu-miR-5099	0.00014209	0.0087111
cerebral cortex development	78	55	3	mmu-miR-146a-3p,mmu-miR-5099,mmu-miR-551b-3p	0.000143278	0.0087475
response to hypoxia	198	124	3	mmu-miR-146a-3p,mmu-miR-5099,mmu-miR-551b-3p	0.000147024	0.00894676
locomotory behavior	100	68	3	mmu-miR-146a-3p,mmu-miR-5099,mmu-miR-551b-3p	0.000148993	0.00903695
muscle organ development	60	44	3	mmu-miR-146a-3p,mmu-miR-5099,mmu-miR-551b-3p	0.000155294	0.00935796
autophagosome assembly	60	44	3	mmu-miR-146a-3p,mmu-miR-5099,mmu-miR-551b-3p	0.000155294	0.00935796
perikaryon	200	125	3	mmu-miR-146a-3p,mmu-miR-5099,mmu-miR-551b-3p	0.000157146	0.00943892
regulation of mitotic cell cycle	44	34	2	mmu-miR-146a-3p,mmu-miR-5099	0.000158826	0.00950905
calmodulin binding	184	116	3	mmu-miR-146a-3p,mmu-miR-5099,mmu-miR-551b-3p	0.000159688	0.00952993
cell population proliferation	161	103	3	mmu-miR-146a-3p,mmu-miR-5099,mmu-miR-551b-3p	0.000161573	0.0096115
negative regulation of transforming growth factor beta receptor signaling pathway	65	47	3	mmu-miR-146a-3p,mmu-miR-5099,mmu-miR-551b-3p	0.000164756	0.00973842
steroid hormone receptor activity	52	39	3	mmu-miR-146a-3p,mmu-miR-5099,mmu-miR-551b-3p	0.000164469	0.00973842
RNA splicing	276	167	3	mmu-miR-146a-3p,mmu-miR-5099,mmu-miR-551b-3p	0.000165808	0.00976951
transcription coactivator binding	20	18	2	mmu-miR-146a-3p,mmu-miR-551b-3p	0.000177019	0.0103643
negative regulation of protein localization to plasma membrane	20	18	2	mmu-miR-146a-3p,mmu-miR-5099	0.000177019	0.0103643
excitatory synapse	41	32	3	mmu-miR-146a-3p,mmu-miR-5099,mmu-miR-551b-3p	0.000177915	0.010384
response to organic cyclic compound	156	100	3	mmu-miR-146a-3p,mmu-miR-5099,mmu-miR-551b-3p	0.00017899	0.010414
visual learning	62	45	3	mmu-miR-146a-3p,mmu-miR-5099,mmu-miR-551b-3p	0.000195799	0.011321
protein kinase C binding	62	45	3	mmu-miR-146a-3p,mmu-miR-5099,mmu-miR-551b-3p	0.000195799	0.011321
negative regulation of smooth muscle cell proliferation	38	30	2	mmu-miR-146a-3p,mmu-miR-5099	0.000196669	0.011336
cartilage development	82	57	3	mmu-miR-146a-3p,mmu-miR-5099,mmu-miR-551b-3p	0.000202595	0.0116054
response to endoplasmic reticulum stress	82	57	3	mmu-miR-146a-3p,mmu-miR-5099,mmu-miR-551b-3p	0.000202595	0.0116054
collagen binding	67	48	3	mmu-miR-146a-3p,mmu-miR-5099,mmu-miR-551b-3p	0.000203476	0.01162
microtubule binding	246	150	3	mmu-miR-146a-3p,mmu-miR-5099,mmu-miR-551b-3p	0.000208993	0.0118985
kidney development	160	102	3	mmu-miR-146a-3p,mmu-miR-5099,mmu-miR-551b-3p	0.000210928	0.0119719
regulation of neural precursor cell proliferation	12	12	3	mmu-miR-146a-3p,mmu-miR-5099,mmu-miR-551b-3p	0.000222302	0.012579
neuronal cell body membrane	32	26	3	mmu-miR-146a-3p,mmu-miR-5099,mmu-miR-551b-3p	0.000227006	0.0127674
establishment of mitotic spindle orientation	32	26	2	mmu-miR-146a-3p,mmu-miR-5099	0.000227006	0.0127674
clathrin coat assembly	16	15	2	mmu-miR-146a-3p,mmu-miR-5099	0.000232159	0.012831
protein K48-linked ubiquitination	59	43	2	mmu-miR-146a-3p,mmu-miR-5099	0.000232286	0.012831
engulfment of apoptotic cell	16	15	2	mmu-miR-146a-3p,mmu-miR-5099	0.000232159	0.012831
histone H4-K5 acetylation	16	15	1	mmu-miR-146a-3p	0.000232159	0.012831
histone H4-K8 acetylation	16	15	1	mmu-miR-146a-3p	0.000232159	0.012831
retrograde transport, endosome to plasma membrane	16	15	3	mmu-miR-146a-3p,mmu-miR-5099,mmu-miR-551b-3p	0.000232159	0.012831
in utero embryonic development	252	153	3	mmu-miR-146a-3p,mmu-miR-5099,mmu-miR-551b-3p	0.000242463	0.0133534
protein-macromolecule adaptor activity	74	52	3	mmu-miR-146a-3p,mmu-miR-5099,mmu-miR-551b-3p	0.000248204	0.0136292
protein localization	91	62	3	mmu-miR-146a-3p,mmu-miR-5099,mmu-miR-551b-3p	0.000264392	0.0144327
regulation of cell migration	91	62	3	mmu-miR-146a-3p,mmu-miR-5099,mmu-miR-551b-3p	0.000264392	0.0144327
chromatin organization	344	203	3	mmu-miR-146a-3p,mmu-miR-5099,mmu-miR-551b-3p	0.000267172	0.0145417
regulation of synaptic vesicle exocytosis	56	41	3	mmu-miR-146a-3p,mmu-miR-5099,mmu-miR-551b-3p	0.000275003	0.0149242
positive regulation of smooth muscle cell proliferation	81	56	3	mmu-miR-146a-3p,mmu-miR-5099,mmu-miR-551b-3p	0.000287466	0.0154649
phagocytic vesicle	81	56	2	mmu-miR-146a-3p,mmu-miR-5099	0.000287466	0.0154649
P-body	81	56	3	mmu-miR-146a-3p,mmu-miR-5099,mmu-miR-551b-3p	0.000287466	0.0154649
excitatory postsynaptic potential	61	44	3	mmu-miR-146a-3p,mmu-miR-5099,mmu-miR-551b-3p	0.000289978	0.0155101
skeletal muscle tissue development	61	44	3	mmu-miR-146a-3p,mmu-miR-5099,mmu-miR-551b-3p	0.000289978	0.0155101
positive regulation of fat cell differentiation	48	36	3	mmu-miR-146a-3p,mmu-miR-5099,mmu-miR-551b-3p	0.000293153	0.0156348
cytoskeletal protein binding	76	53	2	mmu-miR-146a-3p,mmu-miR-5099	0.000295074	0.0156473
Schaffer collateral - CA1 synapse	76	53	3	mmu-miR-146a-3p,mmu-miR-5099,mmu-miR-551b-3p	0.000295074	0.0156473
nuclear envelope	186	116	3	mmu-miR-146a-3p,mmu-miR-5099,mmu-miR-551b-3p	0.000300613	0.0158957
positive regulation of Wnt signaling pathway	37	29	3	mmu-miR-146a-3p,mmu-miR-5099,mmu-miR-551b-3p	0.000316349	0.016633
dendrite cytoplasm	37	29	2	mmu-miR-146a-3p,mmu-miR-5099	0.000316349	0.016633
sensory perception of sound	140	90	3	mmu-miR-146a-3p,mmu-miR-5099,mmu-miR-551b-3p	0.00031853	0.0167003
sarcolemma	133	86	3	mmu-miR-146a-3p,mmu-miR-5099,mmu-miR-551b-3p	0.000321867	0.0168277
cytoplasmic side of plasma membrane	53	39	3	mmu-miR-146a-3p,mmu-miR-5099,mmu-miR-551b-3p	0.000324773	0.0168846
phosphatidylinositol binding	100	67	3	mmu-miR-146a-3p,mmu-miR-5099,mmu-miR-551b-3p	0.000324024	0.0168846
ossification	107	71	3	mmu-miR-146a-3p,mmu-miR-5099,mmu-miR-551b-3p	0.000338876	0.0175685
lactation	45	34	3	mmu-miR-146a-3p,mmu-miR-5099,mmu-miR-551b-3p	0.000339861	0.0175705
integral component of postsynaptic specialization membrane	34	27	2	mmu-miR-146a-3p,mmu-miR-5099	0.000348246	0.0178056
positive regulation of phosphorylation	34	27	2	mmu-miR-146a-3p,mmu-miR-5099	0.000348246	0.0178056
protein K48-linked deubiquitination	34	27	3	mmu-miR-146a-3p,mmu-miR-5099,mmu-miR-551b-3p	0.000348246	0.0178056
protein phosphatase regulator activity	34	27	3	mmu-miR-146a-3p,mmu-miR-5099,mmu-miR-551b-3p	0.000348246	0.0178056
cellular response to hypoxia	121	79	2	mmu-miR-146a-3p,mmu-miR-5099	0.000353533	0.0180263
neurogenesis	63	45	3	mmu-miR-146a-3p,mmu-miR-5099,mmu-miR-551b-3p	0.000356582	0.0180824
integral component of postsynaptic density membrane	63	45	3	mmu-miR-146a-3p,mmu-miR-5099,mmu-miR-551b-3p	0.000356582	0.0180824
peptidyl-threonine phosphorylation	68	48	3	mmu-miR-146a-3p,mmu-miR-5099,mmu-miR-551b-3p	0.000359589	0.0181852
central nervous system development	90	61	3	mmu-miR-146a-3p,mmu-miR-5099,mmu-miR-551b-3p	0.000367844	0.0185521
positive regulation of myelination	22	19	1	mmu-miR-146a-3p	0.000375947	0.0188583
positive regulation of calcium ion transport	31	25	2	mmu-miR-146a-3p,mmu-miR-551b-3p	0.000375563	0.0188583
ruffle	109	72	3	mmu-miR-146a-3p,mmu-miR-5099,mmu-miR-551b-3p	0.000379002	0.0189603
platelet aggregation	28	23	3	mmu-miR-146a-3p,mmu-miR-5099,mmu-miR-551b-3p	0.000393765	0.019334
positive regulation of protein tyrosine kinase activity	42	32	3	mmu-miR-146a-3p,mmu-miR-5099,mmu-miR-551b-3p	0.000391452	0.019334
chemorepellent activity	28	23	3	mmu-miR-146a-3p,mmu-miR-5099,mmu-miR-551b-3p	0.000393765	0.019334
positive regulation of osteoclast differentiation	28	23	3	mmu-miR-146a-3p,mmu-miR-5099,mmu-miR-551b-3p	0.000393765	0.019334
positive regulation of bone mineralization	42	32	3	mmu-miR-146a-3p,mmu-miR-5099,mmu-miR-551b-3p	0.000391452	0.019334
positive regulation of long-term synaptic potentiation	28	23	2	mmu-miR-146a-3p,mmu-miR-5099	0.000393765	0.019334
Rho GTPase binding	42	32	3	mmu-miR-146a-3p,mmu-miR-5099,mmu-miR-551b-3p	0.000391452	0.019334
regulation of axonogenesis	25	21	3	mmu-miR-146a-3p,mmu-miR-5099,mmu-miR-551b-3p	0.000396569	0.0194204
response to ischemia	55	40	3	mmu-miR-146a-3p,mmu-miR-5099,mmu-miR-551b-3p	0.000410962	0.0200196
peroxisomal membrane	55	40	3	mmu-miR-146a-3p,mmu-miR-5099,mmu-miR-551b-3p	0.000410962	0.0200196
sensory perception of pain	75	52	3	mmu-miR-146a-3p,mmu-miR-5099,mmu-miR-551b-3p	0.00042023	0.0204175
receptor-mediated endocytosis	60	43	3	mmu-miR-146a-3p,mmu-miR-5099,mmu-miR-551b-3p	0.000427032	0.0206399
basal plasma membrane	60	43	3	mmu-miR-146a-3p,mmu-miR-5099,mmu-miR-551b-3p	0.000427032	0.0206399
fatty acid metabolic process	189	117	3	mmu-miR-146a-3p,mmu-miR-5099,mmu-miR-551b-3p	0.000432552	0.0208524
protein O-linked glycosylation via serine	11	11	2	mmu-miR-146a-3p,mmu-miR-551b-3p	0.000448201	0.0210275
negative regulation of keratinocyte proliferation	15	14	3	mmu-miR-146a-3p,mmu-miR-5099,mmu-miR-551b-3p	0.000440558	0.0210275
protein phosphatase 2A binding	39	30	2	mmu-miR-146a-3p,mmu-miR-5099	0.000447194	0.0210275
cerebral cortex radially oriented cell migration	15	14	2	mmu-miR-146a-3p,mmu-miR-5099	0.000440558	0.0210275
positive regulation of JUN kinase activity	39	30	3	mmu-miR-146a-3p,mmu-miR-5099,mmu-miR-551b-3p	0.000447194	0.0210275
FAD binding	39	30	3	mmu-miR-146a-3p,mmu-miR-5099,mmu-miR-551b-3p	0.000447194	0.0210275
positive regulation of autophagosome assembly	11	11	2	mmu-miR-146a-3p,mmu-miR-5099	0.000448201	0.0210275
single-stranded RNA binding	47	35	3	mmu-miR-146a-3p,mmu-miR-5099,mmu-miR-551b-3p	0.000448646	0.0210275
inner cell mass cell proliferation	15	14	2	mmu-miR-146a-3p,mmu-miR-5099	0.000440558	0.0210275
hindlimb morphogenesis	11	11	3	mmu-miR-146a-3p,mmu-miR-5099,mmu-miR-551b-3p	0.000448201	0.0210275
neutrophil activation	11	11	2	mmu-miR-146a-3p,mmu-miR-551b-3p	0.000448201	0.0210275
positive regulation of translation	82	56	3	mmu-miR-146a-3p,mmu-miR-5099,mmu-miR-551b-3p	0.000470267	0.0219853
cellular response to cAMP	52	38	1	mmu-miR-146a-3p	0.000487866	0.0227507
neuromuscular junction	89	60	3	mmu-miR-146a-3p,mmu-miR-5099,mmu-miR-551b-3p	0.00050934	0.0236926
ribosome binding	57	41	3	mmu-miR-146a-3p,mmu-miR-5099,mmu-miR-551b-3p	0.000510878	0.0237047
lipid binding	299	177	3	mmu-miR-146a-3p,mmu-miR-5099,mmu-miR-551b-3p	0.000514327	0.0238053
blood vessel development	67	47	3	mmu-miR-146a-3p,mmu-miR-5099,mmu-miR-551b-3p	0.000518463	0.0238776
male gonad development	115	75	3	mmu-miR-146a-3p,mmu-miR-5099,mmu-miR-551b-3p	0.000517741	0.0238776
histone H3 acetylation	44	33	3	mmu-miR-146a-3p,mmu-miR-5099,mmu-miR-551b-3p	0.000524013	0.0240735
adenylate cyclase-activating G protein-coupled receptor signaling pathway	110	72	3	mmu-miR-146a-3p,mmu-miR-5099,mmu-miR-551b-3p	0.00056724	0.025995
cellular response to organic cyclic compound	79	54	3	mmu-miR-146a-3p,mmu-miR-5099,mmu-miR-551b-3p	0.000570121	0.0260627
regulation of cell adhesion	49	36	3	mmu-miR-146a-3p,mmu-miR-5099,mmu-miR-551b-3p	0.000577768	0.0263473
positive regulation of brown fat cell differentiation	18	16	2	mmu-miR-146a-3p,mmu-miR-5099	0.000586664	0.0266222
activin receptor signaling pathway	18	16	3	mmu-miR-146a-3p,mmu-miR-5099,mmu-miR-551b-3p	0.000586664	0.0266222
frizzled binding	41	31	3	mmu-miR-146a-3p,mmu-miR-5099,mmu-miR-551b-3p	0.000608645	0.0274853
transmitter-gated ion channel activity involved in regulation of postsynaptic membrane potential	41	31	3	mmu-miR-146a-3p,mmu-miR-5099,mmu-miR-551b-3p	0.000608645	0.0274853
intracellular receptor signaling pathway	30	24	3	mmu-miR-146a-3p,mmu-miR-5099,mmu-miR-551b-3p	0.000617178	0.0277356
blood vessel morphogenesis	30	24	3	mmu-miR-146a-3p,mmu-miR-5099,mmu-miR-551b-3p	0.000617178	0.0277356
negative regulation of cell growth	126	81	3	mmu-miR-146a-3p,mmu-miR-5099,mmu-miR-551b-3p	0.000619497	0.0277726
integral component of plasma membrane	1192	646	3	mmu-miR-146a-3p,mmu-miR-5099,mmu-miR-551b-3p	0.000650303	0.0290834
cellular senescence	21	18	3	mmu-miR-146a-3p,mmu-miR-5099,mmu-miR-551b-3p	0.000659998	0.0293052
negative regulation of Ras protein signal transduction	27	22	3	mmu-miR-146a-3p,mmu-miR-5099,mmu-miR-551b-3p	0.00065876	0.0293052
syntaxin-1 binding	27	22	3	mmu-miR-146a-3p,mmu-miR-5099,mmu-miR-551b-3p	0.00065876	0.0293052
G-protein beta/gamma-subunit complex binding	24	20	2	mmu-miR-146a-3p,mmu-miR-5099	0.000677924	0.0298866
regulation of metabolic process	24	20	2	mmu-miR-146a-3p,mmu-miR-5099	0.000677924	0.0298866
cullin family protein binding	24	20	2	mmu-miR-146a-3p,mmu-miR-5099	0.000677924	0.0298866
negative regulation of NF-kappaB transcription factor activity	76	52	3	mmu-miR-146a-3p,mmu-miR-5099,mmu-miR-551b-3p	0.000691403	0.0304086
blood vessel remodeling	38	29	3	mmu-miR-146a-3p,mmu-miR-5099,mmu-miR-551b-3p	0.000701985	0.0307284
T cell receptor signaling pathway	88	59	3	mmu-miR-146a-3p,mmu-miR-5099,mmu-miR-551b-3p	0.000701828	0.0307284
regulation of cell population proliferation	207	126	3	mmu-miR-146a-3p,mmu-miR-5099,mmu-miR-551b-3p	0.000707688	0.0309052
mRNA binding	218	132	3	mmu-miR-146a-3p,mmu-miR-5099,mmu-miR-551b-3p	0.000726198	0.031639
axon cytoplasm	61	43	2	mmu-miR-146a-3p,mmu-miR-5099	0.000754438	0.0327924
cation transport	78	53	3	mmu-miR-146a-3p,mmu-miR-5099,mmu-miR-551b-3p	0.000796655	0.0345465
neurotransmitter transport	43	32	3	mmu-miR-146a-3p,mmu-miR-5099,mmu-miR-551b-3p	0.000802593	0.0346422
potassium channel regulator activity	35	27	3	mmu-miR-146a-3p,mmu-miR-5099,mmu-miR-551b-3p	0.000802326	0.0346422
protein N-terminus binding	125	80	3	mmu-miR-146a-3p,mmu-miR-5099,mmu-miR-551b-3p	0.000814029	0.0350542
glycerolipid metabolic process	14	13	2	mmu-miR-146a-3p,mmu-miR-5099	0.000832719	0.0354478
negative regulation of smooth muscle cell migration	14	13	2	mmu-miR-146a-3p,mmu-miR-5099	0.000832719	0.0354478
mRNA destabilization	14	13	2	mmu-miR-146a-3p,mmu-miR-5099	0.000832719	0.0354478
negative regulation of endocytosis	14	13	2	mmu-miR-146a-3p,mmu-miR-551b-3p	0.000832719	0.0354478
establishment of epithelial cell polarity	14	13	2	mmu-miR-146a-3p,mmu-miR-5099	0.000832719	0.0354478
cellular response to growth factor stimulus	73	50	3	mmu-miR-146a-3p,mmu-miR-5099,mmu-miR-551b-3p	0.000838775	0.0355426
BMP signaling pathway	73	50	3	mmu-miR-146a-3p,mmu-miR-5099,mmu-miR-551b-3p	0.000838775	0.0355426
cellular response to calcium ion	85	57	3	mmu-miR-146a-3p,mmu-miR-5099,mmu-miR-551b-3p	0.000852247	0.0360312
anatomical structure development	48	35	2	mmu-miR-146a-3p,mmu-miR-5099	0.000867282	0.0365835
cellular response to epidermal growth factor stimulus	53	38	3	mmu-miR-146a-3p,mmu-miR-5099,mmu-miR-551b-3p	0.000901036	0.0376878
cerebellar granule cell differentiation	10	10	2	mmu-miR-146a-3p,mmu-miR-5099	0.000903614	0.0376878
inner ear morphogenesis	63	44	3	mmu-miR-146a-3p,mmu-miR-5099,mmu-miR-551b-3p	0.000899083	0.0376878
protein K11-linked deubiquitination	10	10	1	mmu-miR-146a-3p	0.000903614	0.0376878
calcium transmembrane transporter activity, phosphorylative mechanism	10	10	1	mmu-miR-146a-3p	0.000903614	0.0376878
positive regulation of filopodium assembly	32	25	3	mmu-miR-146a-3p,mmu-miR-5099,mmu-miR-551b-3p	0.000906124	0.0377078
forebrain development	80	54	3	mmu-miR-146a-3p,mmu-miR-5099,mmu-miR-551b-3p	0.00091126	0.0378366
establishment of protein localization	40	30	3	mmu-miR-146a-3p,mmu-miR-5099,mmu-miR-551b-3p	0.000939865	0.0389373
insulin receptor binding	29	23	3	mmu-miR-146a-3p,mmu-miR-5099,mmu-miR-551b-3p	0.00100698	0.0415323
cell-cell junction assembly	29	23	3	mmu-miR-146a-3p,mmu-miR-5099,mmu-miR-551b-3p	0.00100698	0.0415323
cellular calcium ion homeostasis	101	66	3	mmu-miR-146a-3p,mmu-miR-5099,mmu-miR-551b-3p	0.00100937	0.0415384
regulation of protein phosphorylation	70	48	3	mmu-miR-146a-3p,mmu-miR-5099,mmu-miR-551b-3p	0.00101793	0.0417983
collagen trimer	82	55	3	mmu-miR-146a-3p,mmu-miR-5099,mmu-miR-551b-3p	0.00103537	0.0424203
synapse organization	65	45	2	mmu-miR-146a-3p,mmu-miR-5099	0.00105947	0.0428403
negative regulation of cAMP-mediated signaling	17	15	2	mmu-miR-146a-3p,mmu-miR-5099	0.00105903	0.0428403
RNA polymerase II CTD heptapeptide repeat kinase activity	17	15	3	mmu-miR-146a-3p,mmu-miR-5099,mmu-miR-551b-3p	0.00105903	0.0428403
embryonic hemopoiesis	17	15	2	mmu-miR-146a-3p,mmu-miR-5099	0.00105903	0.0428403
SMAD protein signal transduction	65	45	3	mmu-miR-146a-3p,mmu-miR-5099,mmu-miR-551b-3p	0.00105947	0.0428403
regulation of ARF protein signal transduction	17	15	2	mmu-miR-146a-3p,mmu-miR-5099	0.00105903	0.0428403
thymus development	50	36	3	mmu-miR-146a-3p,mmu-miR-5099,mmu-miR-551b-3p	0.00108012	0.0435803
cell body	117	75	2	mmu-miR-146a-3p,mmu-miR-5099	0.00109098	0.0439231
chemical synaptic transmission	176	108	3	mmu-miR-146a-3p,mmu-miR-5099,mmu-miR-551b-3p	0.00109845	0.044033
embryonic limb morphogenesis	55	39	3	mmu-miR-146a-3p,mmu-miR-5099,mmu-miR-551b-3p	0.00109664	0.044033
response to glucocorticoid	77	52	3	mmu-miR-146a-3p,mmu-miR-5099,mmu-miR-551b-3p	0.00110722	0.0442888
skeletal system development	103	67	3	mmu-miR-146a-3p,mmu-miR-5099,mmu-miR-551b-3p	0.00111359	0.0444477
inhibitory synapse	23	19	3	mmu-miR-146a-3p,mmu-miR-5099,mmu-miR-551b-3p	0.00115071	0.0451612
regulation of dendrite development	20	17	2	mmu-miR-146a-3p,mmu-miR-5099	0.00115093	0.0451612
membrane organization	23	19	3	mmu-miR-146a-3p,mmu-miR-5099,mmu-miR-551b-3p	0.00115071	0.0451612
Rac protein signal transduction	23	19	3	mmu-miR-146a-3p,mmu-miR-5099,mmu-miR-551b-3p	0.00115071	0.0451612
negative regulation of cellular senescence	20	17	2	mmu-miR-146a-3p,mmu-miR-5099	0.00115093	0.0451612
proline-rich region binding	20	17	1	mmu-miR-146a-3p	0.00115093	0.0451612
regulation of AMPA receptor activity	23	19	2	mmu-miR-146a-3p,mmu-miR-551b-3p	0.00115071	0.0451612
peptidyl-threonine dephosphorylation	20	17	1	mmu-miR-146a-3p	0.00115093	0.0451612
Golgi cisterna membrane	72	49	3	mmu-miR-146a-3p,mmu-miR-5099,mmu-miR-551b-3p	0.0011752	0.0460163
response to cold	42	31	3	mmu-miR-146a-3p,mmu-miR-5099,mmu-miR-551b-3p	0.00122073	0.0475984
histone acetyltransferase activity	42	31	3	mmu-miR-146a-3p,mmu-miR-5099,mmu-miR-551b-3p	0.00122073	0.0475984
RNA binding	922	503	3	mmu-miR-146a-3p,mmu-miR-5099,mmu-miR-551b-3p	0.00123582	0.0480857
cation transmembrane transport	79	53	3	mmu-miR-146a-3p,mmu-miR-5099,mmu-miR-551b-3p	0.00125844	0.0488631
synaptic transmission, glutamatergic	34	26	3	mmu-miR-146a-3p,mmu-miR-5099,mmu-miR-551b-3p	0.00126405	0.0489788
chloride channel activity	62	43	3	mmu-miR-146a-3p,mmu-miR-5099,mmu-miR-551b-3p	0.00128457	0.04967
kinesin binding	47	34	3	mmu-miR-146a-3p,mmu-miR-5099,mmu-miR-551b-3p	0.00129309	0.0497919
protein N-linked glycosylation	47	34	3	mmu-miR-146a-3p,mmu-miR-5099,mmu-miR-551b-3p	0.00129309	0.0497919
